# Supplementary material for: Fatigue, quality of life and metabolic changes in men treated with first-line enzalutamide versus abiraterone plus prednisolone for metastatic castration-resistant prostate cancer (HEAT): a randomised trial protocol
Source: PubMed Central journal article supplement — BMJ Open. 2019 Sep 11;9(9):e030218. doi: 10.1136/bmjopen-2019-030218 (PMC6747677; doi:10.1136/bmjopen-2019-030218), 2019-09-11
Supplement: bmjopen-2019-030218.draft_revisions.pdf [file bmjopen-2019-030218.draft_revisions.pdf]

# BMJ Open

BMJ Open is committed to open peer review. As part of this commitment we make the peer review history of every article we publish publicly available.

When an article is published we post the peer reviewers' comments and the authors' responses online. We also post the versions of the paper that were used during peer review. These are the versions that the peer review comments apply to.

The versions of the paper that follow are the versions that were submitted during the peer review process. They are not the versions of record or the final published versions. They should not be cited or distributed as the published version of this manuscript.

BMJ Open is an open access journal and the full, final, typeset and author-corrected version of record of the manuscript is available on our site with no access controls, subscription charges or pay-per-view fees (<http://bmjopen.bmj.com>).

If you have any questions on BMJ Open's open peer review process please email [info.bmjopen@bmj.com](mailto:info.bmjopen@bmj.com)

# BMJ Open

## Fatigue, quality of life and metabolic changes in men treated with first-line enzalutamide versus abiraterone plus prednisolone for metastatic castration-resistant prostate cancer (HEAT): a randomised trial protocol

|                               |                                                                                                                                                                                                                                                                                                                                                                                                                                                                                                                                                                                                           |
|-------------------------------|-----------------------------------------------------------------------------------------------------------------------------------------------------------------------------------------------------------------------------------------------------------------------------------------------------------------------------------------------------------------------------------------------------------------------------------------------------------------------------------------------------------------------------------------------------------------------------------------------------------|
| Journal:                      | <i>BMJ Open</i>                                                                                                                                                                                                                                                                                                                                                                                                                                                                                                                                                                                           |
| Manuscript ID                 | bmjopen-2019-030218                                                                                                                                                                                                                                                                                                                                                                                                                                                                                                                                                                                       |
| Article Type:                 | Protocol                                                                                                                                                                                                                                                                                                                                                                                                                                                                                                                                                                                                  |
| Date Submitted by the Author: | 08-Mar-2019                                                                                                                                                                                                                                                                                                                                                                                                                                                                                                                                                                                               |
| Complete List of Authors:     | Kvorning Ternov, Klara; Herlev and Gentofte Hospital , Department of Urology<br>Sønksen, Jens; Herlev and Gentofte Hospital, Department of Urology<br>Fode, Mikkel; Herlev and Gentofte Hospital, Department of Urology<br>Lindberg, Henriette; Herlev Hospital Department of Oncology<br>Kistorp, Caroline; Copenhagen University Hospital, Rigshospitalet, Department of Endocrinology<br>Bisbjerg, Rasmus; Herlev and Gentofte Hospital, Department of Urology<br>Palapattu, Ganesh; Michigan Medicine, Department of Urology<br>Østergren, Peter; Herlev and Gentofte Hospital, Department of Urology |
| Keywords:                     | Urological tumours < UROLOGY, prostatic neoplasms, castration resistant, enzalutamide, abiraterone, Adverse events < THERAPEUTICS                                                                                                                                                                                                                                                                                                                                                                                                                                                                         |
|                               |                                                                                                                                                                                                                                                                                                                                                                                                                                                                                                                                                                                                           |

SCHOLARONE™  
Manuscripts

# Fatigue, quality of life and metabolic changes in men treated with first-line enzalutamide versus abiraterone plus prednisolone for metastatic castration-resistant prostate cancer (HEAT): a randomised trial protocol

Kvorning Ternov K.<sup>1,5</sup>, Sønksen J.<sup>1,5</sup>, Fode M.<sup>1</sup>, Lindberg H.<sup>2</sup>, Kistorp C.<sup>3,5</sup>, Bisbjerg R.<sup>1</sup>, Palapattu G.<sup>4</sup>, Østergren P.B.<sup>1</sup>

<sup>1</sup>Department of Urology, Herlev and Gentofte Hospital, Herlev, Denmark.

<sup>2</sup>Department of Oncology, Herlev and Gentofte Hospital, Herlev, Denmark.

<sup>3</sup>Department of Endocrinology, Copenhagen University Hospital, Rigshospitalet, Denmark.

<sup>4</sup>Department of Urology, Michigan Medicine, Ann Arbor, USA.

<sup>5</sup>Faculty of Health and Medical Science, University of Copenhagen, Herlev, Denmark.

## Corresponding author

Klara Kvorning Ternov, MD

E-mail: klara.kvorning.ternov@regionh.dk

Telephone number: +45 38686349

Date and version

08/03/2019 version 6.1

Word count

3,225

## Abstract

### Introduction

Enzalutamide and abiraterone acetate plus prednisolone (AAP) are used in combination with androgen deprivation therapy (ADT) to further suppress the androgen stimulation of metastatic castration-resistant prostate cancer (mCRPC). First-line mCRPC treatment with enzalutamide and AAP yields similar overall survival and radiographic progression-free survival in phase III trials. Thus, treatment selection relies on patient choice, cost and side effects. The aim of this randomised trial is to investigate differences in fatigue, health-related quality of life (HRQoL) and metabolic side effects in men treated with enzalutamide versus AAP.

### Methods and analysis

In this ongoing open-label randomised (1:1) clinical trial, enzalutamide is compared with AAP as first-line treatment for men with mCRPC. The primary endpoint is fatigue assessed with the questionnaire Functional Assessment of Chronic Illness Therapy-Fatigue version 4 (FACIT-Fatigue). Secondary endpoints are changes in body composition (i.e. fat mass, visceral adipose tissue, subcutaneous adipose tissue and lean body mass assessed with dual x-ray absorptiometry), glucose metabolism assessed with a two-hour oral glucose tolerance test, serum lipids, blood pressure and HRQoL assessed with the questionnaire Functional Assessment of Cancer Therapy-Prostate (FACT-P). All study endpoints are assessed at baseline and 12-week post-intervention. Blood and urine samples are collected at baseline and at time of progression on allocated treatment for future investigation of predictive and prognostic biomarkers in prostate cancer treatment.

1  
2  
3  
4  
5 The planned sample size is 170 participants. All participants are recruited from Herlev and Gentofte  
6 Hospital, Denmark. Estimated last patient's last visit is February 2020.  
7  
8

### 9 **Ethics and dissemination**

10 The study received project approval from the National Committee on Health Research Ethics and  
11 Danish Data Protection Agency and Danish Medicines Agency (EudraCT no.: 2017-000027-  
12 99). The results of the study will be published in peer-reviewed international journals and will be  
13 presented at national and international conferences and symposiums.  
14  
15

16 **Trial registration:** clinicaltrialsregister.eu, EudraCT no.: 2017-000099-27. Registered on 2017-04-26.

17 **Keywords:** castration resistant, prostate cancer, prostate neoplasm, Enzalutamide, Abiraterone, Abiraterone acetate, Hormone therapy, Adverse  
18 events, side effects, Fatigue, Quality of life, Metabolic changes, Randomised controlled trial  
19  
20  
21  
22

#### 23 **Strength and limitations**

- 24 • This randomised clinical trial will report patient-reported and metabolic side  
25 effects in a relatively large sample size.
- 26 • This is the first randomised head-to-head trial primarily comparing fatigue,  
27 health-related quality of life and metabolic side effects in men with  
28 metastatic castration-resistant prostate cancer treated with first-line  
29 enzalutamide versus abiraterone plus prednisolone.
- 30 • The trial lacks assessment of long-term side effects.  
31  
32

## Introduction

During the past decade, several new treatment options have emerged for metastatic castration-resistant prostate cancer (mCRPC). These new treatment options include the androgen pathway inhibitors enzalutamide and abiraterone acetate. Enzalutamide blocks several steps in the androgen receptor signalling. Abiraterone inhibits enzymes (17 $\alpha$ -hydroxylase and 17, 20-lyase) in the androgen biosynthesis, and is combined with prednisolone to compensate for abiraterone-induced reductions in serum cortisol (1,2)

Enzalutamide and abiraterone acetate plus prednisolone (AAP) yield similar radiographic progression-free and overall survival results in the phase III trials (PREVAIL and COU-AA-302 respectively) which has led to approval as first-line mCRPC treatments (3–6). Thus, the choice between these two agents depends on the patient's preference, costs and agent-specific side effects.

Men with mCRPC that have been treated with ADT, have an increased risk of metabolic side effects and fatigue affecting health-related quality of life (HRQoL) (7,8). Androgen pathway inhibitors are generally safe, with low rates of grade 3 and 4 adverse events. Most of the reported adverse events of these treatments are similar in the mentioned phase III-trials, but the following adverse events were different: enzalutamide was associated with memory impairment and seizures; whereas AAP was associated with liver function abnormalities, peripheral oedema and cardiac events (3,5,9). Fatigue was the most common reported adverse event of both enzalutamide and AAP, although commonly emphasized as a side effect to enzalutamide (3,5). Comparing the results of the two trials is difficult, as the men in the control-group of the enzalutamide trial (PREVAIL) received placebo, whereas the men in the control-group of the AAP trial (COU-AA-302) received placebo plus prednisone (3,5). To date, no head-to-head comparison primarily exploring differences in the side effect profiles have, to our knowledge, been published.

In addition, AAP has been approved for hormone-naïve metastatic prostate cancer and enzalutamide is expected to gain similar approval (12,13, NCT02677896, NCT02319837). This change in treatment sequencing will result in longer exposure to side effects, making comparative studies with specific side effect endpoints even more essential.

This protocol describes an ongoing randomised clinical trial comparing self-reported fatigue and HRQoL and metabolic changes in men treated with enzalutamide or AAP as first-line treatment for mCRPC. The aim is that the results from this trial may help patients and physicians to choose the best tolerated treatment based on the difference in the side effects of enzalutamide and AAP.

## Methods and analysis

### Trial design

This is a single-centre open-labelled randomised (1:1) phase IV trial comparing first-line enzalutamide versus AAP in men with mCRPC. The trial is conducted at the Department of Urology, Herlev and Gentofte Hospital, Denmark. The primary objective is to compare fatigue assessed with the questionnaire Functional Assessment of Chronic Illness Therapy-Fatigue version 4 (FACIT-Fatigue).

### Participants

Eligible participants are men with metastatic prostate cancer progressing on ADT, based on the prostate cancer working group 3 criteria (PCWG3) that include Response Evaluation Criteria in Solid Tumors version 1.1 (RECIST 1.1) (12),13). Metastatic status is measured with computed

tomography (CT) scan of the thorax and abdomen and bone imaging ( $^{18}\text{F}$ -sodium fluoride (NaF) positron emission tomography-computed tomography (PET/CT) or prostate specific membrane antigen (PSMA) PET/CT). Inclusion criteria are age  $\leq 90$  years, an Eastern Cooperative Oncology Group (ECOG) performance status 0-1 and adequate organ function (creatinine  $< 1.5$  x the upper limit of normal (ULN), total bilirubin  $< 1.5$  x ULN and alanine aminotransferase (ALT) or aspartate aminotransferase (AST)  $\leq 2.5$  x ULN). Exclusion criteria are visceral metastases, a prior history of seizures, known heart failure (New York Heart Association (NYHA) functional class  $> 2$ ), diabetes mellitus, hypersensitivity to or previous treatment with enzalutamide or AAP or previous treatment with docetaxel. An exception to the latter is docetaxel in the metastatic hormone-naïve prostate cancer setting, if the treatment was completed more than six months prior to enrolment. Inclusion and exclusion criteria are depicted in **Table 1**. Eligibility is primarily assessed at the department's multidisciplinary team conference, where all patients are evaluated prior to starting first-line mCRPC treatment. Subsequently eligibility is confirmed by the primary investigator at a screening consultation before randomization. This ensures that all eligible men at Herlev and Gentofte Hospital are offered study participation. The timeline from screening to intervention is depicted in **Figure 1**.

### Randomisation

Patients who meet the inclusion and exclusion criteria and have given a written informed consent are randomised at the screening consultation using the Randomization Module of Research electronic data capture (REDCap version 7.1.1. © 2018 Vanderbilt University, Nashville, USA). The allocation sequence is a computer-generated list of random numbers transferred to REDCap by a collaborator with no clinical involvement in the trial. Participants are randomly assigned to either enzalutamide or AAP in a 1:1 ratio without stratification. Randomization follows a block randomization with 60 men in the first block and 110 men in the last block. Participants and physicians are aware of the allocation arm after randomization. Data and outcome assessors are not blinded.

### Interventions

Recruitment began in June 2017 and planned completion is December 2019. Herlev and Gentofte Hospital provides urological cancer care for a population of approximately 1.3 million. We estimate that around 150 men are offered either enzalutamide or AAP as first-line mCRPC treatment yearly at the Department of Urology, Herlev and Gentofte Hospital. Participants are randomised to receive one of the following treatments:

#### Enzalutamide

Participants are allocated to take 160 mg enzalutamide orally in the evening.

#### AAP

Participants are allocated to take 1000 mg abiraterone acetate orally at least 1 hour before a meal or two hours after a meal in the evening.

Participants are instructed to take 10 mg prednisolone orally in the morning.

Participants receive allocated treatment from baseline visit until biochemical and/or radiographic progression or at the treating physician's discretion. Compliance is ensured by registering the number of returned tablets at the follow-up visit. During the trial, all participants continue ADT. In addition, all participants follow normal standard of care according to local and national guidelines,

1  
2  
3  
4 such as being offered bone protecting agents (i.e. denosumab and calcium and vitamin D  
5 supplements).  
6  
7

## 8 **Outcomes**

### 9 ***Measurements***

10 Primary and secondary outcomes are assessed for all participants at baseline and 12-week post-  
11 intervention by the primary investigator. A schedule of enrolment, interventions and assessments is  
12 depicted in **Table 2**.  
13  
14

### 15 ***Primary outcome***

16 The primary endpoint is the between-group differences in changed level of fatigue assessed with the  
17 13-question questionnaire FACIT-Fatigue available and validated in Danish. The participants report  
18 the past week's experienced fatigue by grading each question from one to four: "not at all", "a little  
19 bit", "some-what", "quite a bite" and "very much". A minimal clinical important difference  
20 (MCID) in fatigue is defined as a 3.0 points change on an individual level (14). Fatigue is assessed  
21 at baseline, 12-week post-intervention and at time of disease progression on allocated treatment.  
22  
23  
24

### 25 ***Secondary outcomes***

26 The secondary outcomes are the between-group differences in changed HRQoL, body composition,  
27 blood pressure, insulin sensitivity and resistance measured with a 4-point oral glucose tolerance test  
28 (OGTT), serum lipids and androgen treatment response.  
29  
30

### 31 ***HRQoL***

32 The between-group change in HRQoL is assessed with the 39-question questionnaire Functional  
33 Assessment of Cancer Therapy - for patients with Prostate cancer version 4 (FACT-P) available and  
34 validated in Danish. FACT-P is assessed with the same grading as the FACIT-fatigue questionnaire.  
35 An MCID in HRQoL is defined as a 6 points change on an individual level (15). HRQoL is  
36 assessed at baseline, 12-week post-intervention and at time of disease progression on allocated  
37 treatment.  
38  
39

### 40 ***Body composition***

41 Fat mass, body fat %, visceral adipose tissue volume (VAT), subcutaneous adipose tissue volume  
42 (SAT) and lean body mass (LBM) are obtained using dual energy X-ray absorptiometry (DXA)  
43 whole body fan-beam scans (Hologic Discovery, Bedford, Massachusetts, USA) with the software  
44 APEX 4.0. VAT and SAT are measured in a 5 cm wide horizontal slice across the abdomen from  
45 the iliac crest to the L4-L5 segment (16,17). Weight (BWB-800A, TANITA, Tokoyo, Japan) and  
46 body mass index (height in meters<sup>2</sup>/weight in kilograms) is assessed as well. Systolic and diastolic  
47 blood pressure is measured on the right arm after at least 20 minutes of rest (BP A3 Plus, Microlife  
48 AG, Widnau, Switzerland).  
49  
50  
51

### 52 ***OGTT***

53 The first 60 participants undergo a two-hour oral glucose (75 g) tolerance test (OGTT) after at least  
54 9 hours of fasting. Plasma glucose and insulin are measured after 0, 30, 60 and 120 minutes. The  
55 whole body insulin sensitivity index (Matsuda index) are calculated from plasma glucose and  
56 insulin concentrations attained from the two-hour OGTT in the subgroup of 60 participants (18).  
57 The equation for calculating the Matsuda index is:  $10.000/\sqrt{(FPG \times FPI \times \text{mean PG} \times \text{mean PI})}$ .  
58 FPG is the fasting plasma glucose and FPI is the fasting plasma insulin concentration. Fasting  
59  
60

1  
2  
3  
4 plasma glucose and insulin are measured in all 170 participants. Fasting insulin resistance is  
5 calculated from the basal glucose and insulin concentrations using the homeostatic model  
6 assessment (HOMA-IR) with following equation:  $(FPG \times FPI)/22.5$  (19).  
7

#### 8 *Biochemical assays*

9 All blood samples are drawn before 10 am after a minimum of 9 hours of fasting.  
10  
11

#### 12 *Metabolic analyses*

13 Plasma glucose is analysed with an enzymatic assay (Vitros 5.1, Ortho-Clinical Diagnostics, USA).  
14 Plasma insulin is analysed with a sandwich chemiluminescence immunoassay (ADVIA Centaur  
15 XP, Siemens, Germany). Glycated haemoglobin (HbA1c) is measured by high-performance liquid  
16 chromatography (Variant II TURBO, Bio-RAD, USA). Triglycerides, total cholesterol, HDL  
17 cholesterol, LDL cholesterol and VLDL cholesterol are assayed by an enzymatic technique (Vitros  
18 5.1 FS, Ortho-Clinical Diagnostics, USA).  
19  
20

#### 21 *Androgen treatment response*

22 Serum total testosterone, androstenedione, dehydroepiandrosterone sulphate (DHEAS) and 17-  
23 hydroxyprogesterone are measured by Liquid chromatography – tandem mass spectrometry  
24 (Acquity UPLC Xevo™ TQ MS, Waters, USA). Sex hormone binding globulin (SHBG) is  
25 analysed by a competitive chemiluminescence based immunoassay (Cobas, Roche Diagnostics,  
26 Mannheim, Germany). Plasma Luteinizing hormone (LH) and follicle stimulating hormone (FSH)  
27 are measured using sandwich chemiluminescence immunoassay (ADVIA Centaur®, Siemens,  
28 Germany).  
29  
30

#### 31 *Additional measurements*

##### 32 *Common terminology criteria for adverse events*

33 Adverse events will be registered at the 12-week post-intervention visit, using the common  
34 terminology criteria for adverse events version 4 (20).  
35  
36  
37  
38

##### 39 *Metabolic biomarkers*

40 Samples of full blood and serum are prospectively collected at baseline and 12-week post-  
41 intervention for future assessment of cardiac, adipose and inflammatory biomarkers.  
42  
43

##### 44 *Genetic biomarkers*

45 A biobank is generated during the trial and will be used for a future prospective, observational study  
46 assessing the predictive and prognostic value of genetic biomarkers in circulating cell-free DNA  
47 (ccfDNA). Samples from blood and urine are prospectively collected at baseline and at time of  
48 disease progression on allocated treatment. Somatic alterations will be analysed from ccfDNA in  
49 plasma, urine pellets and supernatant.  
50  
51

#### 52 **Patient and public involvement**

53 The patients treated with enzalutamide and AAP inspired us to the design of the trial's research  
54 question and outcomes, by sharing their experience of the treatment and associated side-effects in  
55 the out-patient clinic of Herlev and Gentofte Hospital. Fatigue is the primary outcome of the trial,  
56 since fatigue is the most common and distressing symptom experienced by patients with mCRPC  
57 (21). The burden of the intervention is partly assessed by patient-reported questionnaires assessing  
58  
59  
60



1  
2  
3  
4 fatigue and HRQoL. Patients were not involved in the recruitment to or conduct of the trial. The  
5 results of the trial will be made publically available through the homepage of Herlev and Gentofte  
6 Hospital.  
7

### 8 9 **Sample size and statistical analysis**

10 The sample size calculation is based on the detection of a between-group MCID of 3.0 points on the  
11 FACIT-Fatigue scale, with an anticipated drop-out of 10% (14). The standard deviation is assumed  
12 to be 6.55, based on confidence limits from previous studies assessing fatigue in men with  
13 metastatic prostate cancer (22–24). The sample size calculation is based on a two-tailed significance  
14 level of 5% and a power of 80%. This required a sample size of 85 participants in each group, a  
15 total of 170 men.  
16  
17

18 The within-subject and between-group differences of the primary and secondary endpoints will be  
19 analysed with linear mixed effect models using constrained longitudinal analysis (cLDA). The  
20 between-group MCID in fatigue and HRQoL will be analysed with risk difference. An MCID in  
21 fatigue is defined as an individual 3-point change in the FACIT-Fatigue total score. An MCID in  
22 HRQoL is defined as an individual 6-point change in FACT-P total score. Interactions between  
23 patient reported outcomes (fatigue and quality of life), and age (< 75 versus  $\geq 75$  years) and extent  
24 of metastases (high versus low volume disease) will be tested in sub-group analyses using forest  
25 plots. High volume disease is defined as  $\geq 4$  bone metastases with  $\geq 1$  bone metastases outside  
26 pelvis and column. Interactions between metabolic changes, and BMI (<30 versus  $\geq 30$ ) and age  
27 (<75 years versus  $\geq 75$ ) will be analysed in sub-group analyses using forest plots. The linear mixed  
28 effect model using cLDA handles random missing data.  
29  
30  
31

### 32 **Ethics and dissemination**

33 Participants will receive standard first-line treatment for mCRPC. The primary investigator obtains  
34 the written informed consent from all participants. The trial follows the ICH-GCP guidelines for  
35 good clinical practice, the latest revision of the Declaration of Helsinki and the Danish rules on  
36 Clinical Trials of Medicines in Humans. This trial is approved by the National Committee on  
37 Health Research Ethics (H-17001347), Danish Data Protection Agency (2012-58-0004) and Danish  
38 Medicines Agency (EudraCT no.: 2017-000027-99, [www.clinicaltrialsregister.eu](http://www.clinicaltrialsregister.eu)). The trial is  
39 externally monitored by Good Clinical Practice Unit, Copenhagen University. The trial's results  
40 will be published in peer-reviewed international journals or otherwise made publicly available and  
41 will be presented at national and international conferences and symposiums irrespective of the  
42 outcomes. Patient reported outcome and metabolic changes will be reported in the same publication,  
43 while hormone analyses and genetic biomarkers will be reported in separate publications. Study  
44 completion is expected by spring 2020, and dissemination of the results will begin as soon as  
45 possible thereafter.  
46  
47  
48  
49

### 50 **Discussion**

51 This article describes the protocol of an ongoing randomised clinical trial comparing fatigue,  
52 HRQoL and metabolic changes in men with mCRPC treated with first-line enzalutamide versus  
53 AAP.  
54  
55

56 We chose fatigue as the primary endpoint since it is the most common and distressing symptom  
57 affecting HRQoL in men with mCRPC (21). We assess changes in patient reported fatigue with the  
58 validated 13-question questionnaire FACIT-Fatigue. Previous randomised clinical trials on  
59  
60

1  
2  
3  
4 enzalutamide and AAP measured the level of fatigue with Common Terminology Criteria for  
5 Adverse Event with a coarse three-level grading, from fatigue “relieved by rest” to fatigue “limiting  
6 self-care” (3,5). We expect that changes in fatigue will be reported more accurately from patients  
7 using the 13-question questionnaires in contrast to the physician reported three-level grading used  
8 in previously trials. We did not choose to assess fatigue by interviews since that would preclude a  
9 statistical comparison of changes in fatigue, even though interviews might yield a more individual  
10 assessment of fatigue.  
11  
12

13 We chose to assess changes in patient reported HRQoL with the 39-question questionnaire  
14 FACT-P, because FACT-P is developed and validated for assessing HRQoL in men with prostate  
15 cancer. Changed HRQoL for men with metastatic prostate cancer has previously been measured  
16 with FACT-P in randomized clinical trials, and the results can therefore be compared with existing  
17 literature (25–27).  
18  
19

20 We chose to comprehensively assess metabolic changes, including glucose metabolism measured  
21 with oral glucose tolerance test and HbA1c, and body composition measured with DXA scans.  
22 Previous randomised clinical trials on enzalutamide and abiraterone have measured following  
23 metabolic adverse events: plasma glucose, weight, and blood pressure (3–6). We did not choose to  
24 measure plasma glucose, because the within-subject plasma glucose varies widely, and fasting  
25 plasma glucose alone fails to diagnose approximately 30% of cases of previously undiagnosed  
26 diabetes (28,29). We chose to assess glucose metabolism with OGTT and HbA1c because the  
27 hyperglycaemic disease process is a risk factor for microvascular complications, diabetes and  
28 cardiovascular disease and may be present without fulfilling the criteria for diabetes (28). We chose  
29 to measure BMI and body composition with DXA scans because both methods can identify obesity  
30 and associated metabolic and cardiovascular risks (30–32), while DXA scans can identify body fat  
31 which may be a better predictor of metabolic syndrome than BMI alone (33,34). We measure lean  
32 body mass with DXA scans, because a loss of lean mass can over time contribute to a decrease in  
33 muscle strength which are important predictors of balance, the occurrence of falls and mortality  
34 (35,36).  
35  
36  
37

38 We chose 3-month follow-up to evaluate the treatments side effects and at the same time to avoid a  
39 pronounced influence of disease progression on HRQoL and fatigue. In a cohort study of 21  
40 participants metabolic changes appeared already after 7 to 10 days of treatment with low-dose  
41 prednisolone (6 mg/day) (37). Changes in fatigue and HRQoL can be experienced within the first  
42 three months of treatment with new androgen pathway inhibitors (25). The median time until  
43 biochemical progression was 11.1 and 11.2 months for men with mCRPC treated with AAP and  
44 enzalutamide, respectively (3,5). However, 14% (74/546) had biochemical progression after only 3  
45 months' treatment with AAP; and 8% (70/854) had biochemical progression after 3 months'  
46 treatment with enzalutamide (3,5).  
47  
48

49 The lack of blinding can be perceived as a weakness, but we find that it is of minor importance and  
50 unlikely to affect the objectively measured outcomes. Blood samples are analysed in an  
51 independent laboratory, DXA scans are analysed with the same software and outcomes on fatigue  
52 and HRQoL are reported by participants.  
53  
54  
55  
56  
57  
58  
59  
60

**Conclusion**

The aim of this trial is to assess differences in the patient reported and metabolic side effects of enzalutamide and AAP. The results may in the future help patients and physicians to choose the best tolerated treatment and thereby reduce treatment induced morbidity and improve quality of life.

For peer review only

## References

1. Potter G a, Barrie SE, Jarman M, Rowlands MG. Novel steroidal inhibitors of human cytochrome P45017 alpha (17 alpha-hydroxylase-C17,20-lyase): potential agents for the treatment of prostatic cancer. *J Med Chem*. 1995;38(13):2463–71.
2. Auchus RJ, Yu MK, Nguyen S, Mundle SD. Use of Prednisone With Abiraterone Acetate in Metastatic Castration-Resistant Prostate Cancer. *Oncologist*. 2014;
3. Ryan CJ, Smith MR, de Bono JS, Molina A, Logothetis CJ, de Souza P, et al. Abiraterone in metastatic prostate cancer without previous chemotherapy. *N Engl J Med* [Internet]. 2013 Jan 10;368(2):138–48. Available from: <http://www.ncbi.nlm.nih.gov/pubmed/29137449>
4. Rathkopf DE, Smith MR, de Bono JS, Logothetis CJ, Shore ND, de Souza P, et al. Updated interim efficacy analysis and long-term safety of abiraterone acetate in metastatic castration-resistant prostate cancer patients without prior chemotherapy (COU-AA-302). *Eur Urol* [Internet]. 2014 Nov;66(5):815–25. Available from: <http://www.ncbi.nlm.nih.gov/pubmed/24647231>
5. Beer TM, Armstrong AJ, Rathkopf DE, Loriot Y, Sternberg CN, Higano CS, et al. Enzalutamide in metastatic prostate cancer before chemotherapy. *N Engl J Med* [Internet]. 2014 Jul 31;371(5):424–33. Available from: <http://www.ncbi.nlm.nih.gov/pubmed/29137449>
6. Evans CP, Higano CS, Keane T, Andriole G, Saad F, Iversen P, et al. The PREVAIL Study: Primary Outcomes by Site and Extent of Baseline Disease for Enzalutamide-treated Men with Chemotherapy-naïve Metastatic Castration-resistant Prostate Cancer. *Eur Urol* [Internet]. 2016 Mar 19;70(4):675–83. Available from: <http://linkinghub.elsevier.com/retrieve/pii/S0302283816002748%5Cnhttp://www.ncbi.nlm.nih.gov/pubmed/27006332>
7. Storey DJ, McLaren DB, Atkinson MA, Butcher I, Frew LC, Smyth JF, et al. Clinically relevant fatigue in men with hormone-sensitive prostate cancer on long-term androgen deprivation therapy. *Ann Oncol*. 2012;
8. Østergren PB, Kistorp C, Bennedbæk FN, Faber J, Sønksen J, Fode M. The use of exercise interventions to overcome adverse effects of androgen deprivation therapy. *Nature Reviews Urology*. 2016.
9. Moreira RB, Debiase M, Francini E, Nuzzo PV, Velasco G, Maluf FC, Fay AP, Bellmunt, Choueiri TK SF. Differential Side Effects Profile in mCRPC Patients Treated With Abiraterone or Enzalutamide: A Meta-Analysis of Randomized Controlled Trials. *Clin Adv Hematol Oncol* [Internet]. 2016 Apr;14(4 Suppl 5):14–5. Available from: <http://www.ncbi.nlm.nih.gov/pubmed/27167845>
10. Fizazi K, Tran N, Fein L, Matsubara N, Rodriguez-Antolin A, Alekseev BY, et al. Abiraterone plus Prednisone in Metastatic, Castration-Sensitive Prostate Cancer. *N Engl J Med* [Internet]. 2017;377(4):352–60. Available from: <http://www.nejm.org/doi/10.1056/NEJMoa1704174>
11. James ND, de Bono JS, Spears MR, Clarke NW, Mason MD, Dearnaley DP, et al. Abiraterone for Prostate Cancer Not Previously Treated with Hormone Therapy. *N Engl J Med* [Internet]. 2017;377(4):338–51. Available from: <http://www.ncbi.nlm.nih.gov/pubmed/28578639>
12. H.I. S, M.J. M, W.M. S, C. H, E. B, K. F, et al. Trial design and objectives for castration-resistant prostate cancer: Updated recommendations from the prostate cancer clinical trials working group 3 [Internet]. Vol. 34, *Journal of Clinical Oncology*. 2016. p. 1402–18. Available from: <http://jco.ascopubs.org/content/34/12/1402.full.pdf+html%5Cnhttp://ovidsp.ovid.com/ovidweb.cgi?T=JS&PAGE=reference&D=emed18a&NEWS=N&AN=609745695>
13. Eisenhauer EA, Therasse P, Bogaerts J, Schwartz LH, Sargent D, Ford R, et al. New response evaluation criteria in solid tumours: Revised RECIST guideline (version 1.1). *Eur J Cancer*. 2009;45(2):228–47.
14. Cella D, Eton DT, Lai JS, Peterman AH, Merkel DE. Combining anchor and distribution-based methods to derive minimal clinically important differences on the Functional Assessment of Cancer Therapy (FACT) anemia and fatigue scales. *J Pain Symptom Manage*. 2002;24(6):547–61.
15. Cella D, Nichol MB, Eton D, Nelson JB, Mulani P. Estimating clinically meaningful changes for the Functional Assessment of Cancer Therapy--Prostate: results from a clinical trial of patients with metastatic hormone-refractory prostate cancer. *Value Health* [Internet]. 2008;12(1):124–9. Available from: <http://www.ncbi.nlm.nih.gov/pubmed/18647260>
16. Bredella MA, Gill CM, Keating LK, Torriani M, Anderson EJ, Punyanitya M, et al. Assessment of abdominal fat compartments using DXA in premenopausal women from anorexia nervosa to morbid obesity. *Obesity*. 2013;21(12):2458–64.
17. Micklesfield LK, Goedecke JH, Punyanitya M, Wilson KE, Kelly TL. Dual-energy X-ray performs as well as clinical computed tomography for the measurement of visceral fat. *Obesity*. 2012;20(5):1109–14.
18. Matsuda M, DeFronzo RA. Insulin Sensitivity Indices Obtained From Oral Glucose Tolerance Testing. *Diabetes Care*. 1999;22(9).

1  
2  
3  
4  
5  
6  
7  
8  
9  
10  
11  
12  
13  
14  
15  
16  
17  
18  
19  
20  
21  
22  
23  
24  
25  
26  
27  
28  
29  
30  
31  
32  
33  
34  
35  
36  
37  
38  
39  
40  
41  
42  
43  
44  
45  
46  
47  
48  
49  
50  
51  
52  
53  
54  
55  
56  
57  
58  
59  
60

19. Patarrão RS, Wayne Lutt W, Paula Macedo M. Assessment of methods and indexes of insulin sensitivity. *Rev Port Endocrinol Diabetes e Metab.* 2014;
20. Services H. Common Terminology Criteria for Adverse Events (CTCAE) version 4.0. Publish. 2010;
21. Colloca G, Venturino A, Governato I, Checcaglini F. Incidence and Correlates of Fatigue in Metastatic Castration-Resistant Prostate Cancer: A Systematic Review. Vol. 14, *Clinical Genitourinary Cancer.* 2016. p. 5–11.
22. Cormie P, Galv??o DA, Spry N, Joseph D, Chee R, Taaffe DR, et al. Can supervised exercise prevent treatment toxicity in patients with prostate cancer initiating androgen-deprivation therapy: A randomised controlled trial. *BJU Int.* 2015;115(2):256–66.
23. Bourke L, Gilbert S, Hooper R, Steed LA, Joshi M, Catto JWF, et al. Lifestyle changes for improving disease-specific quality of life in sedentary men on long-term androgen-deprivation therapy for advanced prostate cancer: A randomised controlled trial. *Eur Urol.* 2014;65(5):865–72.
24. Bourke L, Doll H, Crank H, Daley A, Rosario D, Saxton JM. Lifestyle intervention in men with advanced prostate cancer receiving androgen suppression therapy: a feasibility study. *Cancer Epidemiol Biomarkers Prev [Internet].* 2011;20(4):647–57. Available from: <http://www.ncbi.nlm.nih.gov/pubmed/21335510>
25. Khalaf DJ, Sunderland K, Eigl BJ, Kollmannsberger CK, Ivanov N, Finch DL, et al. Health-related Quality of Life for Abiraterone Plus Prednisone Versus Enzalutamide in Patients with Metastatic Castration-resistant Prostate Cancer: Results from a Phase II Randomized Trial. *Eur Urol [Internet].* 2018 Dec 24; Available from: <http://www.ncbi.nlm.nih.gov/pubmed/30591354>
26. Basch E, Autio K, Ryan CJ, Mulders P, Shore N, Kheoh T, et al. Abiraterone acetate plus prednisone versus prednisone alone in chemotherapy-naive men with metastatic castration-resistant prostate cancer: Patient-reported outcome results of a randomised phase 3 trial. *Lancet Oncol.* 2013;
27. Loriot Y, Miller K, Sternberg CN, Fizazi K, De Bono JS, Chowdhury S, et al. Effect of enzalutamide on health-related quality of life, pain, and skeletal-related events in asymptomatic and minimally symptomatic, chemotherapy-naive patients with metastatic castration-resistant prostate cancer (PREVAIL): Results from a randomised, p. *Lancet Oncol.* 2015;
28. Diabetes DOF, American Diabetes Association. Diagnosis and classification of diabetes mellitus. *Diabetes Care.* 2009;
29. World Health Organisation (WHO), International Diabetes Federation (IDF). Definition and Diagnosis of Diabetes Mellitus and Intermediate Hyperglycemia. *World Heal Organ.* 2006;
30. Obesity: preventing and managing the global epidemic. Report of a WHO consultation. *World Heal Organ - Tech Rep Ser.* 2000;
31. Lang PO, Trivalle C, Vogel T, Proust J, Papazian JP. Markers of metabolic and cardiovascular health in adults: Comparative analysis of DEXA-based body composition components and BMI categories. *J Cardiol.* 2015;
32. Zhu S, Wang ZM, Shen W, Heymsfield SB, Heshka S. Percentage body fat ranges associated with metabolic syndrome risk: Results based on the third National Health and Nutrition Examination Survey (1988-1994). *American Journal of Clinical Nutrition.* 2003.
33. Liu P, Ma F, Lou H, Liu Y. The utility of fat mass index vs. body mass index and percentage of body fat in the screening of metabolic syndrome. *BMC Public Health.* 2013;
34. Gómez-Ambrosi J, Silva C, Galofré JC, Escalada J, Santos S, Millán D, et al. Body mass index classification misses subjects with increased cardiometabolic risk factors related to elevated adiposity. *Int J Obes.* 2012;
35. Lee CG, Boyko EJ, Nielson CM, Stefanick ML, Bauer DC, Hoffman AR, et al. Mortality risk in older men associated with changes in weight, lean mass, and fat mass. *J Am Geriatr Soc.* 2011;
36. Wolfson L, Judge J, Whipple R, King M. Strength is a major factor in balance, gait, and the occurrence of falls. *J Gerontol A Biol Sci Med Sci.* 1995;
37. Petersons CJ, Mangelsdorf BL, Jenkins AB, Poljak A, Smith MD, Greenfield JR, et al. Effects of low-dose prednisolone on hepatic and peripheral insulin sensitivity, insulin secretion, and abdominal adiposity in patients with inflammatory rheumatologic disease. *Diabetes Care.* 2013;36(9):2822–9.

## Contributions

KKT, PBØ, JS, CK, HL, MF, GP and RB participated in the design of the study. KKT conceived the study and participated in its design and coordination. KKT and PBØ drafted the study protocol. KKT drafted the manuscript and all authors read and approved the final manuscript.

We want to thank the patients, treated with enzalutamide and AAP at Herlev and Gentofte Hospital, for inspiring us to design this trial by openly sharing their experience of their treatment and associated side-effects.

## Funding statement

Jens Sønksen, trial sponsor, PhD, DMSci, Chair Professor of Urology

Mail: [Jens.Soenksen@regionh.dk](mailto:Jens.Soenksen@regionh.dk)

This work was supported by SPCG Clinical Research Grant 2017 and the internal research fund of Herlev and Gentofte Hospital.

## Competing interests statement

The authors have following conflicts of interest:

PBØ is speaker for Astellas, Ipsen and Ferring.

MF is speaker for Ferring and Astellas and advisory board representative for Astellas.

HL is advisory board representative for Roche, Janssen, Astellas, Bayer and Sanofi-Aventis.

## Tables

*Table 1. Inclusion and exclusion criteria*

| Inclusion criteria                                                                                                                                                                                                                                                                                                                                                                                                                                                                                                                                                                                                                                                                                                                                                                                                                                                                                                                                                                                                                                                                                                                                                                                                                                                                                                                                                                                                                                                                                                                                                                                                                                          | Exclusion criteria                                                                                                                                                                                                                                                                                                                                                                                                                                                                                                                                                                                                                                                                                                                                                                                                                                                                                                                                                                                                                                                                                                                      |
|-------------------------------------------------------------------------------------------------------------------------------------------------------------------------------------------------------------------------------------------------------------------------------------------------------------------------------------------------------------------------------------------------------------------------------------------------------------------------------------------------------------------------------------------------------------------------------------------------------------------------------------------------------------------------------------------------------------------------------------------------------------------------------------------------------------------------------------------------------------------------------------------------------------------------------------------------------------------------------------------------------------------------------------------------------------------------------------------------------------------------------------------------------------------------------------------------------------------------------------------------------------------------------------------------------------------------------------------------------------------------------------------------------------------------------------------------------------------------------------------------------------------------------------------------------------------------------------------------------------------------------------------------------------|-----------------------------------------------------------------------------------------------------------------------------------------------------------------------------------------------------------------------------------------------------------------------------------------------------------------------------------------------------------------------------------------------------------------------------------------------------------------------------------------------------------------------------------------------------------------------------------------------------------------------------------------------------------------------------------------------------------------------------------------------------------------------------------------------------------------------------------------------------------------------------------------------------------------------------------------------------------------------------------------------------------------------------------------------------------------------------------------------------------------------------------------|
| <ul style="list-style-type: none"> <li>• Eligible for first line treatment with either enzalutamide or abiraterone acetate plus prednisolone as per standard of care guidelines</li> <li>• Age 18-90 years</li> <li>• Willing, capable and legally competent individuals</li> <li>• ECOG performance status 0-1</li> <li>• Histologically confirmed adenocarcinoma of the prostate</li> <li>• Prior surgical orchiectomy or if on LHRH agonist/antagonist, then testosterone &lt; 1.7 nmol/L at screening visit (participants must maintain LHRH agonist/antagonist therapy for duration of study treatment if not surgically castrated)</li> <li>• Evidence of metastatic disease on bone scan or CT scan</li> <li>• Evidence of biochemical or imaging progression in the setting of surgical or medical castration. Progressive disease for study entry is defined by one of the following criteria based on criteria of PCWG3:               <ul style="list-style-type: none"> <li>○ Biochemical progression: Obtain sequence of rising PSA values at a minimum of 1-week intervals, resulting in increases over the nadir, with PSA &gt; 1 ng/mL</li> <li>○ Radiological progression:                   <ul style="list-style-type: none"> <li>▪ The appearance of two or more new bone lesions on bone scan</li> <li>▪ Enlargement of a soft tissue lesion using the modified RECIST 1.1.</li> </ul> </li> </ul> </li> <li>• Adequate organ function defined as:               <ul style="list-style-type: none"> <li>○ Creatinine &lt; 1,5 x ULN</li> <li>○ Total bilirubin &lt; 1,5 x ULN</li> <li>○ ALT or AST ≤ 2,5 x ULN</li> </ul> </li> </ul> | <ul style="list-style-type: none"> <li>• Inability to understand and/or stick to the written information</li> <li>• Previous treatment with docetaxel, with the exception of previous treatment with early docetaxel (≤ 6 series) ≥ 6 months before inclusion.</li> <li>• Diagnosed with diabetes mellitus and/or HbA1C &gt; 48 mmol/mol.</li> <li>• Hypersensitivity towards components in abiraterone acetate plus prednisolone or enzalutamide</li> <li>• Ongoing treatment with high doses of glucocorticoids</li> <li>• Severe concurrent illness or co-morbid disease that would make the subject unsuitable for enrolment</li> <li>• Prior therapy with CYP17 inhibitors, enzalutamide or other experimental anti-androgens</li> <li>• Life expectancy &lt; 6 months</li> <li>• Active concurrent malignancy</li> <li>• Treatment with Radium-223</li> <li>• Known brain metastases</li> <li>• Liver or lung metastases on CT-scanning.</li> <li>• History of seizure or seizure disorder, or history of cerebrovascular stroke within 6 months of study entry.</li> <li>• Known cardiac failure (&gt; NYHA class II)</li> </ul> |

ECOG, Eastern Cooperative Oncology Group. LHRH, luteinizing hormone-releasing hormone. CT, computed tomography. PCWG3, prostate cancer working group 3. RECIST, Response Evaluation Criteria in Solid Tumors. ULN, upper limit of normal. ALT, Alanine aminotransferase. AST, aspartate aminotransferase. HbA1C, Glycated haemoglobin. NYHA, New York Heart Association.

Table 2. Schedule of enrolment, interventions, and assessments.

| Visit                                         | Randomization and enrollment | Baseline visit | 12-week follow-up | Follow-up at time of disease progression |
|-----------------------------------------------|------------------------------|----------------|-------------------|------------------------------------------|
| <b>Time (weeks from treatment initiation)</b> | <b>-4± 2</b>                 | <b>0</b>       | <b>+12 ± 2</b>    | <b>+ 10 until the year 2023</b>          |
| Written informed consent                      | X                            |                |                   |                                          |
| Medical history                               | X                            |                |                   |                                          |
| Medication list                               | X                            | X              | X                 |                                          |
| ECOG Performance status                       | X                            | X              | X                 |                                          |
| <b>Physical</b>                               |                              |                |                   |                                          |
| Height                                        |                              | X              |                   |                                          |
| Blood pressure, weight, BMI                   |                              | X              | X                 |                                          |
| <b>Questionnaires</b>                         |                              |                |                   |                                          |
| FACIT-Fatigue                                 |                              | X              | X                 | X                                        |
| FACT-P                                        |                              | X              | X                 | X                                        |
| <b>Samples</b>                                |                              |                |                   |                                          |
| Blood samples                                 |                              | X              | X                 | X                                        |
| Urine sample                                  |                              | X              |                   | X                                        |
| <b>Other paraclinical examinations</b>        |                              |                |                   |                                          |
| DXA scan                                      |                              | X              | X                 |                                          |
| OGTT (only the first 60 participants)         |                              | X              | X                 |                                          |
| <b>Safety</b>                                 |                              |                |                   |                                          |
| Adverse Events                                |                              |                | X                 |                                          |

ECOG, Eastern Cooperative Oncology Group. BMI, Body Mass Index, FACIT-Fatigue, Functional Assessment of Chronic Illness Therapy-Fatigue. FACT-P, Functional Assessment of Cancer Therapy-Prostate. DXA, dual energy X-ray absorptiometry. OGTT, Oral Glucose Tolerance Test.



1  
2  
3  
4  
5  
6  
7  
8  
9  
10  
11  
12  
13  
14  
15  
16  
17  
18  
19  
20  
21  
22  
23  
24  
25  
26  
27  
28  
29  
30  
31  
32  
33  
34  
35  
36  
37  
38  
39  
40  
41  
42  
43  
44  
45  
46  
47  
48  
49  
50  
51  
52  
53  
54  
55  
56  
57  
58  
59  
60

### Figures

*Figure 1. Timeline from screening to intervention*

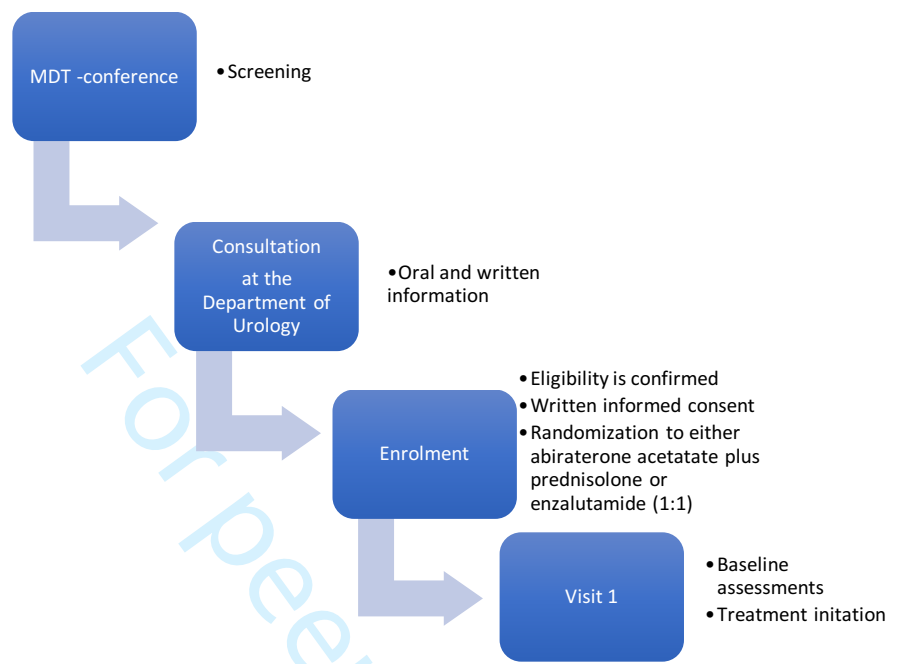

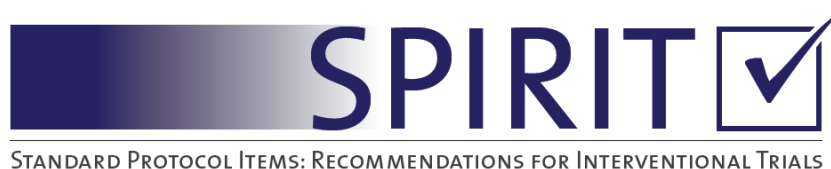

SPIRIT 2013 Checklist: Recommended items to address in a clinical trial protocol and related documents\*

| Section/item                      | Item No | Description                                                                                                                                                                                                                                                                              | Page |
|-----------------------------------|---------|------------------------------------------------------------------------------------------------------------------------------------------------------------------------------------------------------------------------------------------------------------------------------------------|------|
| <b>Administrative information</b> |         |                                                                                                                                                                                                                                                                                          |      |
| Title                             | 1       | Descriptive title identifying the study design, population, interventions, and, if applicable, trial acronym                                                                                                                                                                             | 1    |
| Trial registration                | 2a      | Trial identifier and registry name. If not yet registered, name of intended registry                                                                                                                                                                                                     | 2    |
|                                   | 2b      | All items from the World Health Organization Trial Registration Data Set                                                                                                                                                                                                                 |      |
| Protocol version                  | 3       | Date and version identifier                                                                                                                                                                                                                                                              | 1    |
| Funding                           | 4       | Sources and types of financial, material, and other support                                                                                                                                                                                                                              | 10   |
| Roles and responsibilities        | 5a      | Names, affiliations, and roles of protocol contributors                                                                                                                                                                                                                                  | 1+10 |
|                                   | 5b      | Name and contact information for the trial sponsor                                                                                                                                                                                                                                       | 10   |
|                                   | 5c      | Role of study sponsor and funders, if any, in study design; collection, management, analysis, and interpretation of data; writing of the report; and the decision to submit the report for publication, including whether they will have ultimate authority over any of these activities | 10   |
|                                   | 5d      | Composition, roles, and responsibilities of the coordinating centre, steering committee, endpoint adjudication committee, data management team, and other individuals or groups overseeing the trial, if applicable (see Item 21a for data monitoring committee)                         | NR   |
| <b>Introduction</b>               |         |                                                                                                                                                                                                                                                                                          |      |
| Background and rationale          | 6a      | Description of research question and justification for undertaking the trial, including summary of relevant studies (published and unpublished) examining benefits and harms for each intervention                                                                                       | 3    |
|                                   | 6b      | Explanation for choice of comparators                                                                                                                                                                                                                                                    | 3    |
| Objectives                        | 7       | Specific objectives or hypotheses                                                                                                                                                                                                                                                        | 3    |

|    |                                                           |     |                                                                                                                                                                                                                                                                                                                                                                                |        |
|----|-----------------------------------------------------------|-----|--------------------------------------------------------------------------------------------------------------------------------------------------------------------------------------------------------------------------------------------------------------------------------------------------------------------------------------------------------------------------------|--------|
| 1  |                                                           |     |                                                                                                                                                                                                                                                                                                                                                                                |        |
| 2  |                                                           |     |                                                                                                                                                                                                                                                                                                                                                                                |        |
| 3  |                                                           |     |                                                                                                                                                                                                                                                                                                                                                                                |        |
| 4  |                                                           |     |                                                                                                                                                                                                                                                                                                                                                                                |        |
| 5  |                                                           |     |                                                                                                                                                                                                                                                                                                                                                                                |        |
| 6  |                                                           |     |                                                                                                                                                                                                                                                                                                                                                                                |        |
| 7  |                                                           |     |                                                                                                                                                                                                                                                                                                                                                                                |        |
| 8  |                                                           |     |                                                                                                                                                                                                                                                                                                                                                                                |        |
| 9  |                                                           |     |                                                                                                                                                                                                                                                                                                                                                                                |        |
| 10 |                                                           |     |                                                                                                                                                                                                                                                                                                                                                                                |        |
| 11 |                                                           |     |                                                                                                                                                                                                                                                                                                                                                                                |        |
| 12 |                                                           |     |                                                                                                                                                                                                                                                                                                                                                                                |        |
| 13 |                                                           |     |                                                                                                                                                                                                                                                                                                                                                                                |        |
| 14 |                                                           |     |                                                                                                                                                                                                                                                                                                                                                                                |        |
| 15 |                                                           |     |                                                                                                                                                                                                                                                                                                                                                                                |        |
| 16 |                                                           |     |                                                                                                                                                                                                                                                                                                                                                                                |        |
| 17 |                                                           |     |                                                                                                                                                                                                                                                                                                                                                                                |        |
| 18 |                                                           |     |                                                                                                                                                                                                                                                                                                                                                                                |        |
| 19 |                                                           |     |                                                                                                                                                                                                                                                                                                                                                                                |        |
| 20 |                                                           |     |                                                                                                                                                                                                                                                                                                                                                                                |        |
| 21 |                                                           |     |                                                                                                                                                                                                                                                                                                                                                                                |        |
| 22 |                                                           |     |                                                                                                                                                                                                                                                                                                                                                                                |        |
| 23 |                                                           |     |                                                                                                                                                                                                                                                                                                                                                                                |        |
| 24 |                                                           |     |                                                                                                                                                                                                                                                                                                                                                                                |        |
| 25 |                                                           |     |                                                                                                                                                                                                                                                                                                                                                                                |        |
| 26 |                                                           |     |                                                                                                                                                                                                                                                                                                                                                                                |        |
| 27 |                                                           |     |                                                                                                                                                                                                                                                                                                                                                                                |        |
| 28 |                                                           |     |                                                                                                                                                                                                                                                                                                                                                                                |        |
| 29 |                                                           |     |                                                                                                                                                                                                                                                                                                                                                                                |        |
| 30 |                                                           |     |                                                                                                                                                                                                                                                                                                                                                                                |        |
| 31 |                                                           |     |                                                                                                                                                                                                                                                                                                                                                                                |        |
| 32 |                                                           |     |                                                                                                                                                                                                                                                                                                                                                                                |        |
| 33 |                                                           |     |                                                                                                                                                                                                                                                                                                                                                                                |        |
| 34 |                                                           |     |                                                                                                                                                                                                                                                                                                                                                                                |        |
| 35 |                                                           |     |                                                                                                                                                                                                                                                                                                                                                                                |        |
| 36 |                                                           |     |                                                                                                                                                                                                                                                                                                                                                                                |        |
| 37 |                                                           |     |                                                                                                                                                                                                                                                                                                                                                                                |        |
| 38 |                                                           |     |                                                                                                                                                                                                                                                                                                                                                                                |        |
| 39 |                                                           |     |                                                                                                                                                                                                                                                                                                                                                                                |        |
| 40 |                                                           |     |                                                                                                                                                                                                                                                                                                                                                                                |        |
| 41 |                                                           |     |                                                                                                                                                                                                                                                                                                                                                                                |        |
| 42 |                                                           |     |                                                                                                                                                                                                                                                                                                                                                                                |        |
| 43 |                                                           |     |                                                                                                                                                                                                                                                                                                                                                                                |        |
| 44 |                                                           |     |                                                                                                                                                                                                                                                                                                                                                                                |        |
| 45 |                                                           |     |                                                                                                                                                                                                                                                                                                                                                                                |        |
| 46 |                                                           |     |                                                                                                                                                                                                                                                                                                                                                                                |        |
| 47 |                                                           |     |                                                                                                                                                                                                                                                                                                                                                                                |        |
| 48 |                                                           |     |                                                                                                                                                                                                                                                                                                                                                                                |        |
| 49 |                                                           |     |                                                                                                                                                                                                                                                                                                                                                                                |        |
| 50 |                                                           |     |                                                                                                                                                                                                                                                                                                                                                                                |        |
| 51 |                                                           |     |                                                                                                                                                                                                                                                                                                                                                                                |        |
| 52 |                                                           |     |                                                                                                                                                                                                                                                                                                                                                                                |        |
| 53 |                                                           |     |                                                                                                                                                                                                                                                                                                                                                                                |        |
| 54 |                                                           |     |                                                                                                                                                                                                                                                                                                                                                                                |        |
| 55 |                                                           |     |                                                                                                                                                                                                                                                                                                                                                                                |        |
| 56 |                                                           |     |                                                                                                                                                                                                                                                                                                                                                                                |        |
| 57 |                                                           |     |                                                                                                                                                                                                                                                                                                                                                                                |        |
| 58 |                                                           |     |                                                                                                                                                                                                                                                                                                                                                                                |        |
| 59 |                                                           |     |                                                                                                                                                                                                                                                                                                                                                                                |        |
| 60 |                                                           |     |                                                                                                                                                                                                                                                                                                                                                                                |        |
|    | Trial design                                              | 8   | Description of trial design including type of trial (eg, parallel group, crossover, factorial, single group), allocation ratio, and framework (eg, superiority, equivalence, noninferiority, exploratory)                                                                                                                                                                      | 3      |
|    | <b>Methods: Participants, interventions, and outcomes</b> |     |                                                                                                                                                                                                                                                                                                                                                                                |        |
|    |                                                           |     |                                                                                                                                                                                                                                                                                                                                                                                |        |
|    | Study setting                                             | 9   | Description of study settings (eg, community clinic, academic hospital) and list of countries where data will be collected. Reference to where list of study sites can be obtained                                                                                                                                                                                             | 3      |
|    | Eligibility criteria                                      | 10  | Inclusion and exclusion criteria for participants. If applicable, eligibility criteria for study centres and individuals who will perform the interventions (eg, surgeons, psychotherapists)                                                                                                                                                                                   | 3-4+13 |
|    | Interventions                                             | 11a | Interventions for each group with sufficient detail to allow replication, including how and when they will be administered                                                                                                                                                                                                                                                     | 4      |
|    |                                                           | 11b | Criteria for discontinuing or modifying allocated interventions for a given trial participant (eg, drug dose change in response to harms, participant request, or improving/worsening disease)                                                                                                                                                                                 | 4      |
|    |                                                           | 11c | Strategies to improve adherence to intervention protocols, and any procedures for monitoring adherence (eg, drug tablet return, laboratory tests)                                                                                                                                                                                                                              | 4      |
|    |                                                           | 11d | Relevant concomitant care and interventions that are permitted or prohibited during the trial                                                                                                                                                                                                                                                                                  | 4      |
|    | Outcomes                                                  | 12  | Primary, secondary, and other outcomes, including the specific measurement variable (eg, systolic blood pressure), analysis metric (eg, change from baseline, final value, time to event), method of aggregation (eg, median, proportion), and time point for each outcome. Explanation of the clinical relevance of chosen efficacy and harm outcomes is strongly recommended | 5-6    |
|    | Participant timeline                                      | 13  | Time schedule of enrolment, interventions (including any run-ins and washouts), assessments, and visits for participants. A schematic diagram is highly recommended (see Figure)                                                                                                                                                                                               | 12+14  |
|    | Sample size                                               | 14  | Estimated number of participants needed to achieve study objectives and how it was determined, including clinical and statistical assumptions supporting any sample size calculations                                                                                                                                                                                          | 6-7    |
|    | Recruitment                                               | 15  | Strategies for achieving adequate participant enrolment to reach target sample size                                                                                                                                                                                                                                                                                            | 4      |

|                                                                     |     |                                                                                                                                                                                                                                                                                                                                                                                                              |     |
|---------------------------------------------------------------------|-----|--------------------------------------------------------------------------------------------------------------------------------------------------------------------------------------------------------------------------------------------------------------------------------------------------------------------------------------------------------------------------------------------------------------|-----|
| <b>Methods: Assignment of interventions (for controlled trials)</b> |     |                                                                                                                                                                                                                                                                                                                                                                                                              |     |
| Allocation:                                                         |     |                                                                                                                                                                                                                                                                                                                                                                                                              | 4   |
| Sequence generation                                                 | 16a | Method of generating the allocation sequence (eg, computer-generated random numbers), and list of any factors for stratification. To reduce predictability of a random sequence, details of any planned restriction (eg, blocking) should be provided in a separate document that is unavailable to those who enrol participants or assign interventions                                                     |     |
| Allocation concealment mechanism                                    | 16b | Mechanism of implementing the allocation sequence (eg, central telephone; sequentially numbered, opaque, sealed envelopes), describing any steps to conceal the sequence until interventions are assigned                                                                                                                                                                                                    | 4   |
| Implementation                                                      | 16c | Who will generate the allocation sequence, who will enrol participants, and who will assign participants to interventions                                                                                                                                                                                                                                                                                    | 4   |
| Blinding (masking)                                                  | 17a | Who will be blinded after assignment to interventions (eg, trial participants, care providers, outcome assessors, data analysts), and how                                                                                                                                                                                                                                                                    | 4   |
|                                                                     | 17b | If blinded, circumstances under which unblinding is permissible, and procedure for revealing a participant's allocated intervention during the trial                                                                                                                                                                                                                                                         | NR  |
| <b>Methods: Data collection, management, and analysis</b>           |     |                                                                                                                                                                                                                                                                                                                                                                                                              |     |
| Data collection methods                                             | 18a | Plans for assessment and collection of outcome, baseline, and other trial data, including any related processes to promote data quality (eg, duplicate measurements, training of assessors) and a description of study instruments (eg, questionnaires, laboratory tests) along with their reliability and validity, if known. Reference to where data collection forms can be found, if not in the protocol | 5-6 |
|                                                                     | 18b | Plans to promote participant retention and complete follow-up, including list of any outcome data to be collected for participants who discontinue or deviate from intervention protocols                                                                                                                                                                                                                    | 4   |
| Data management                                                     | 19  | Plans for data entry, coding, security, and storage, including any related processes to promote data quality (eg, double data entry; range checks for data values). Reference to where details of data management procedures can be found, if not in the protocol                                                                                                                                            | 7   |
| Statistical methods                                                 | 20a | Statistical methods for analysing primary and secondary outcomes. Reference to where other details of the statistical analysis plan can be found, if not in the protocol                                                                                                                                                                                                                                     | 7   |
|                                                                     | 20b | Methods for any additional analyses (eg, subgroup and adjusted analyses)                                                                                                                                                                                                                                                                                                                                     | 7   |

|                                 |     |                                                                                                                                                                                                                                                                                                                                       |    |
|---------------------------------|-----|---------------------------------------------------------------------------------------------------------------------------------------------------------------------------------------------------------------------------------------------------------------------------------------------------------------------------------------|----|
|                                 |     |                                                                                                                                                                                                                                                                                                                                       |    |
|                                 |     |                                                                                                                                                                                                                                                                                                                                       | 7  |
|                                 | 20c | Definition of analysis population relating to protocol non-adherence (eg, as randomised analysis), and any statistical methods to handle missing data (eg, multiple imputation)                                                                                                                                                       |    |
| <b>Methods: Monitoring</b>      |     |                                                                                                                                                                                                                                                                                                                                       |    |
| Data monitoring                 | 21a | Composition of data monitoring committee (DMC); summary of its role and reporting structure; statement of whether it is independent from the sponsor and competing interests; and reference to where further details about its charter can be found, if not in the protocol. Alternatively, an explanation of why a DMC is not needed | 7  |
|                                 | 21b | Description of any interim analyses and stopping guidelines, including who will have access to these interim results and make the final decision to terminate the trial                                                                                                                                                               | NR |
| Harms                           | 22  | Plans for collecting, assessing, reporting, and managing solicited and spontaneously reported adverse events and other unintended effects of trial interventions or trial conduct                                                                                                                                                     | 6  |
| Auditing                        | 23  | Frequency and procedures for auditing trial conduct, if any, and whether the process will be independent from investigators and the sponsor                                                                                                                                                                                           | NR |
| <b>Ethics and dissemination</b> |     |                                                                                                                                                                                                                                                                                                                                       |    |
| Research ethics approval        | 24  | Plans for seeking research ethics committee/institutional review board (REC/IRB) approval                                                                                                                                                                                                                                             | 7  |
| Protocol amendments             | 25  | Plans for communicating important protocol modifications (eg, changes to eligibility criteria, outcomes, analyses) to relevant parties (eg, investigators, REC/IRBs, trial participants, trial registries, journals, regulators)                                                                                                      | 7  |
| Consent or assent               | 26a | Who will obtain informed consent or assent from potential trial participants or authorised surrogates, and how (see Item 32)                                                                                                                                                                                                          | 7  |
|                                 | 26b | Additional consent provisions for collection and use of participant data and biological specimens in ancillary studies, if applicable                                                                                                                                                                                                 | 7  |
| Confidentiality                 | 27  | How personal information about potential and enrolled participants will be collected, shared, and maintained in order to protect confidentiality before, during, and after the trial                                                                                                                                                  | 7  |
| Declaration of interests        | 28  | Financial and other competing interests for principal investigators for the overall trial and each study site                                                                                                                                                                                                                         | 11 |

|                               |     |                                                                                                                                                                                                                                                                                     |     |
|-------------------------------|-----|-------------------------------------------------------------------------------------------------------------------------------------------------------------------------------------------------------------------------------------------------------------------------------------|-----|
| Access to data                | 29  | Statement of who will have access to the final trial dataset, and disclosure of contractual agreements that limit such access for investigators                                                                                                                                     | 4+8 |
| Ancillary and post-trial care | 30  | Provisions, if any, for ancillary and post-trial care, and for compensation to those who suffer harm from trial participation                                                                                                                                                       | NR  |
| Dissemination policy          | 31a | Plans for investigators and sponsor to communicate trial results to participants, healthcare professionals, the public, and other relevant groups (eg, via publication, reporting in results databases, or other data sharing arrangements), including any publication restrictions | 7   |
|                               | 31b | Authorship eligibility guidelines and any intended use of professional writers                                                                                                                                                                                                      | 10  |
|                               | 31c | Plans, if any, for granting public access to the full protocol, participant-level dataset, and statistical code                                                                                                                                                                     | NR  |
| <b>Appendices</b>             |     |                                                                                                                                                                                                                                                                                     |     |
| Informed consent materials    | 32  | Model consent form and other related documentation given to participants and authorised surrogates                                                                                                                                                                                  |     |
| Biological specimens          | 33  | Plans for collection, laboratory evaluation, and storage of biological specimens for genetic or molecular analysis in the current trial and for future use in ancillary studies, if applicable                                                                                      |     |

\*It is strongly recommended that this checklist be read in conjunction with the SPIRIT 2013 Explanation & Elaboration for important clarification on the items. Amendments to the protocol should be tracked and dated. The SPIRIT checklist is copyrighted by the SPIRIT Group under the Creative Commons "[Attribution-NonCommercial-NoDerivs 3.0 Unported](https://creativecommons.org/licenses/by-nc-nd/3.0/)" license.

# BMJ Open

## Fatigue, quality of life and metabolic changes in men treated with first-line enzalutamide versus abiraterone plus prednisolone for metastatic castration-resistant prostate cancer (HEAT): a randomised trial protocol

|                                 |                                                                                                                                                                                                                                                                                                                                                                                                                                                                                                                                                                                                           |
|---------------------------------|-----------------------------------------------------------------------------------------------------------------------------------------------------------------------------------------------------------------------------------------------------------------------------------------------------------------------------------------------------------------------------------------------------------------------------------------------------------------------------------------------------------------------------------------------------------------------------------------------------------|
| Journal:                        | <i>BMJ Open</i>                                                                                                                                                                                                                                                                                                                                                                                                                                                                                                                                                                                           |
| Manuscript ID                   | bmjopen-2019-030218.R1                                                                                                                                                                                                                                                                                                                                                                                                                                                                                                                                                                                    |
| Article Type:                   | Protocol                                                                                                                                                                                                                                                                                                                                                                                                                                                                                                                                                                                                  |
| Date Submitted by the Author:   | 07-Aug-2019                                                                                                                                                                                                                                                                                                                                                                                                                                                                                                                                                                                               |
| Complete List of Authors:       | Kvorning Ternov, Klara; Herlev and Gentofte Hospital , Department of Urology<br>Sønksen, Jens; Herlev and Gentofte Hospital, Department of Urology<br>Fode, Mikkel; Herlev and Gentofte Hospital, Department of Urology<br>Lindberg, Henriette; Herlev Hospital Department of Oncology<br>Kistorp, Caroline; Copenhagen University Hospital, Rigshospitalet, Department of Endocrinology<br>Bisbjerg, Rasmus; Herlev and Gentofte Hospital, Department of Urology<br>Palapattu, Ganesh; Michigan Medicine, Department of Urology<br>Østergren, Peter; Herlev and Gentofte Hospital, Department of Urology |
| <b>Primary Subject Heading</b>: | Urology                                                                                                                                                                                                                                                                                                                                                                                                                                                                                                                                                                                                   |
| Secondary Subject Heading:      | Oncology                                                                                                                                                                                                                                                                                                                                                                                                                                                                                                                                                                                                  |
| Keywords:                       | prostatic neoplasms, castration resistant, enzalutamide, abiraterone, Adverse events < THERAPEUTICS, Urological tumours < UROLOGY                                                                                                                                                                                                                                                                                                                                                                                                                                                                         |
|                                 |                                                                                                                                                                                                                                                                                                                                                                                                                                                                                                                                                                                                           |

SCHOLARONE™  
Manuscripts

# Fatigue, quality of life and metabolic changes in men treated with first-line enzalutamide versus abiraterone plus prednisolone for metastatic castration-resistant prostate cancer (HEAT): a randomised trial protocol

Kvorning Ternov K.<sup>1,5</sup>, Sønksen J.<sup>1,5</sup>, Fode M.<sup>1</sup>, Lindberg H.<sup>2</sup>, Kistorp C.<sup>3,5</sup>, Bisbjerg R.<sup>1</sup>, Palapattu G.<sup>4</sup>, Østergren P.B.<sup>1</sup>

<sup>1</sup>Department of Urology, Herlev and Gentofte Hospital, Herlev, Denmark.

<sup>2</sup>Department of Oncology, Herlev and Gentofte Hospital, Herlev, Denmark.

<sup>3</sup>Department of Endocrinology, Copenhagen University Hospital, Rigshospitalet, Denmark.

<sup>4</sup>Department of Urology, Michigan Medicine, Ann Arbor, USA.

<sup>5</sup>Faculty of Health and Medical Science, University of Copenhagen, Herlev, Denmark.

## Corresponding author

Klara Kvorning Ternov, MD

E-mail: klara.kvorning.ternov@regionh.dk

Telephone number: +45 38686349

Date and version

06/08/2019 version 7

Word count

3323

## Abstract

### Introduction

Enzalutamide and abiraterone acetate plus prednisolone (AAP) are used in combination with androgen deprivation therapy (ADT) to further suppress the androgen stimulation of metastatic castration-resistant prostate cancer (mCRPC). First-line mCRPC treatment with enzalutamide and AAP yields similar overall survival and radiographic progression-free survival in phase III trials. Thus, treatment selection relies on patient choice, cost and side effects. The aim of this randomised trial is to investigate differences in fatigue, health-related quality of life (HRQoL) and metabolic side effects in men with mCRPC treated with first-line enzalutamide versus AAP.

### Methods and analysis

In this ongoing open-label randomised (1:1) clinical trial, enzalutamide is compared with AAP as first-line treatment for men with mCRPC. The primary endpoint is fatigue assessed with the questionnaire Functional Assessment of Chronic Illness Therapy-Fatigue version 4 (FACIT-Fatigue). Secondary endpoints are changes in body composition (i.e. fat mass, visceral adipose tissue, subcutaneous adipose tissue and lean body mass assessed with dual x-ray absorptiometry), glucose metabolism assessed with a two-hour oral glucose tolerance test, serum lipids, blood pressure and HRQoL assessed with the questionnaire Functional Assessment of Cancer Therapy-Prostate (FACT-P). All study endpoints are assessed at baseline and 12-week post-intervention. Blood and urine samples are collected at baseline and at time of progression on allocated treatment for future investigation of predictive and prognostic biomarkers in prostate cancer treatment.



1  
2  
3  
4  
5 The planned sample size is 170 participants. All participants are recruited from Herlev and Gentofte  
6 Hospital, Denmark. Estimated last patient's last visit is February 2020.  
7  
8

### 9 **Ethics and dissemination**

10 The study received project approval from the National Committee on Health Research Ethics and  
11 Danish Data Protection Agency and Danish Medicines Agency (EudraCT no.: 2017-000027-  
12 99). The results of the study will be published in peer-reviewed international journals and will be  
13 presented at national and international conferences and symposiums.  
14  
15

16 **Trial registration:** clinicaltrialsregister.eu, EudraCT no.: 2017-000099-27. Registered on 2017-04-26.

17 **Keywords:** castration resistant, prostate cancer, prostate neoplasm, Enzalutamide, Abiraterone, Abiraterone acetate, Hormone therapy, Adverse  
18 events, side effects, Fatigue, Quality of life, Metabolic changes, Randomised controlled trial  
19  
20  
21  
22

#### 23 **Strength and limitations**

- 24 • This randomised clinical trial will report patient-reported and metabolic side  
25 effects in a relatively large sample size.
- 26 • This is the first randomised head-to-head trial primarily comparing fatigue,  
27 health-related quality of life and metabolic side effects in men with  
28 metastatic castration-resistant prostate cancer treated with first-line  
29 enzalutamide versus abiraterone plus prednisolone.
- 30 • The trial lacks assessment of long-term side effects.  
31  
32

1  
2  
3  
4  
5  
6  
7  
8  
9  
10  
11  
12  
13  
14  
15  
16  
17  
18  
19  
20  
21  
22  
23  
24  
25  
26  
27  
28  
29  
30  
31  
32  
33  
34  
35  
36  
37  
38  
39  
40  
41  
42  
43  
44  
45  
46  
47  
48  
49  
50  
51  
52  
53  
54  
55  
56  
57  
58  
59  
60

## Introduction

During the past decade, several new treatment options have emerged for metastatic castration-resistant prostate cancer (mCRPC). These new treatment options include the androgen pathway inhibitors enzalutamide and abiraterone acetate. Enzalutamide blocks several steps in the androgen receptor signalling. Abiraterone inhibits enzymes (17 $\alpha$ -hydroxylase and 17, 20-lyase) in the androgen biosynthesis, and is combined with prednisolone to compensate for abiraterone-induced reductions in serum cortisol (1,2).

Enzalutamide and abiraterone acetate plus prednisolone (AAP) yield similar radiographic progression-free and overall survival results in the phase III trials (PREVAIL and COU-AA-302 respectively) which has led to approval as first-line mCRPC treatments (3–6). Thus, the choice between these two agents depends on the patient's preference, costs and agent-specific side effects.

Men with mCRPC that have been treated with androgen deprivation therapy (ADT), have an increased risk of metabolic side effects and fatigue affecting health-related quality of life (HRQoL) (7,8). Androgen pathway inhibitors are generally safe, with low rates of grade 3 and 4 adverse events. Most of the reported adverse events of these treatments are similar in the mentioned phase III-trials, but the following adverse events were different: enzalutamide was associated with memory impairment and seizures; whereas AAP was associated with liver function abnormalities, peripheral oedema and cardiac events (3,5,9). Fatigue was the most common reported adverse event of both enzalutamide and AAP, although commonly emphasized as a side effect to enzalutamide (3,5). Comparing the results of the two trials is difficult, as the men in the control-group of the enzalutamide trial (PREVAIL) received placebo, whereas the men in the control-group of the AAP trial (COU-AA-302) received placebo plus prednisone (3,5). To date, no randomised head-to-head comparison primarily exploring differences in the side effect profiles have, to our knowledge, been published.

In addition, AAP has been approved for hormone-naïve metastatic prostate cancer and enzalutamide is expected to gain similar approval (10–12, NCT02677896, NCT02319837). This change in treatment sequencing will result in longer exposure to side effects, making comparative studies with specific side effect endpoints even more essential.

This protocol describes an ongoing randomised clinical trial comparing self-reported fatigue and HRQoL and metabolic changes in men treated with enzalutamide or AAP as first-line treatment for mCRPC. The aim is that the results from this trial may help patients and physicians to choose the best tolerated treatment based on the difference in the side effects of enzalutamide and AAP.

## Methods and analysis

### Trial design

This is a single-centre open-labelled randomised (1:1) phase IV trial comparing first-line enzalutamide versus AAP in men with mCRPC. The trial is conducted at the Department of Urology, Herlev and Gentofte Hospital, Denmark. The primary objective is to compare fatigue assessed with the questionnaire Functional Assessment of Chronic Illness Therapy-Fatigue version 4 (FACIT-Fatigue).

### Participants

Eligible participants are men with newly diagnosed mCRPC, defined as metastatic prostate cancer progressing on ADT, based on the prostate cancer working group 3 criteria (PCWG3) (13)..

1  
2  
3  
4 Metastatic status is measured with computed tomography (CT) scan of the thorax and abdomen and  
5 bone imaging ( $^{18}\text{F}$ -sodium fluoride (NaF) positron emission tomography-computed  
6 tomography (PET/CT) or prostate specific membrane antigen (PSMA) PET/CT). Inclusion criteria  
7 are age  $\leq 90$  years, an Eastern Cooperative Oncology Group (ECOG) performance status 0-1 and  
8 adequate organ function (creatinine  $< 1.5 \times$  the upper limit of normal (ULN), total bilirubin  $< 1.5 \times$   
9 ULN and alanine aminotransferase (ALT) or aspartate aminotransferase (AST)  $\leq 2.5 \times$  ULN).  
10 Exclusion criteria are visceral metastases, a prior history of seizures, known heart failure (New  
11 York Heart Association (NYHA) functional class  $> 2$ ), diabetes mellitus, hypersensitivity to or  
12 previous treatment with enzalutamide or AAP or previous treatment with docetaxel. An exception  
13 to the latter is docetaxel in the metastatic hormone-naïve prostate cancer setting, if the treatment  
14 was completed more than six months prior to enrolment. Inclusion and exclusion criteria are  
15 depicted in **Table 1**. Eligibility is primarily assessed at the department's multidisciplinary team  
16 conference, where all patients are evaluated prior to starting first-line mCRPC treatment.  
17 Subsequently eligibility is confirmed by the primary investigator at a screening consultation before  
18 randomization. This ensures that all eligible men at Herlev and Gentofte Hospital are offered study  
19 participation. The timeline from screening to intervention is depicted in **Figure 1**.  
20  
21  
22  
23

### 24 **Randomisation**

25 Patients who meet the inclusion and exclusion criteria and have given a written informed consent  
26 are randomised at the screening consultation using the Randomization Module of Research  
27 electronical data capture (REDCap version 7.1.1. © 2018 Vanderbilt University, Nashville, USA).  
28 The allocation sequence is a computer-generated list of random numbers transferred to REDCap by  
29 a collaborator with no clinical involvement in the trial. Participants are randomly assigned to either  
30 enzalutamide or AAP in a 1:1 ratio without stratification. Randomization follows a block  
31 randomization with 60 men in the first block and 110 men in the last block. Participants and  
32 physicians are aware of the allocation arm after randomization. Data and outcome assessors are not  
33 blinded.  
34  
35  
36

### 37 **Interventions**

38 Recruitment began in June 2017 and planned completion is December 2019. Herlev and Gentofte  
39 Hospital provides urological cancer care for a population of approximately 1.3 million. We estimate  
40 that around 150 men are offered either enzalutamide or AAP as first-line mCRPC treatment yearly  
41 at the Department of Urology, Herlev and Gentofte Hospital. Participants are randomised to receive  
42 one of the following treatments:  
43

#### 44 **Enzalutamide**

45 Participants are allocated to take 160 mg enzalutamide orally in the evening.  
46  
47

#### 48 **AAP**

49 Participants are allocated to take 1000 mg abiraterone acetate orally at least 1 hour before a meal or  
50 two hours after a meal in the evening.  
51

52 Participants are instructed to take 10 mg prednisolone orally in the morning.  
53

54 Compliance is ensured by registering the number of returned tablets at the follow-up visit. During  
55 the trial, all participants continue ADT. In addition, all participants follow normal standard of care  
56 and monitoring according to local and national guidelines at the Department of Urology, Herlev and  
57 Gentofte Hospital, such as being offered bone protecting agents (i.e. denosumab and calcium and  
58 vitamin D supplements). Participants receive allocated treatment from baseline visit until  
59  
60

1  
2  
3  
4 biochemical and/or radiographic progression or at the treating physician's discretion after which  
5 appropriate choice of second-line mCRPC treatment will be decided at multidisciplinary team  
6 conferences as per standard of care.  
7  
8  
9

## 10 **Outcomes**

### 11 *Measurements*

12 Primary and secondary outcomes are assessed for all participants at baseline and 12-week post-  
13 intervention by the primary investigator. A schedule of enrolment, interventions and assessments is  
14 depicted in **Table 2**.  
15  
16

### 17 *Primary outcome*

18 The primary endpoint is the between-group differences in changed level of fatigue assessed with the  
19 13-question questionnaire FACIT-Fatigue available and validated in Danish. The participants report  
20 the past week's experienced fatigue by grading each question from one to four: "not at all", "a little  
21 bit", "some-what", "quite a bite" and "very much". A minimal clinically important difference  
22 (MCID) in fatigue is defined as a 3.0 points change on an individual level (14). Fatigue is assessed  
23 at baseline, 12-week post-intervention and at time of disease progression on allocated treatment.  
24  
25

### 26 *Secondary outcomes*

27 The secondary outcomes are the between-group differences in changed HRQoL, body composition,  
28 blood pressure, insulin sensitivity and resistance measured with a 4-point oral glucose tolerance test  
29 (OGTT), serum lipids and androgen treatment response.  
30  
31

### 32 *HRQoL*

33 The between-group change in HRQoL is assessed with the 39-question questionnaire Functional  
34 Assessment of Cancer Therapy - for patients with Prostate cancer version 4 (FACT-P) available and  
35 validated in Danish. FACT-P is assessed with the same grading as the FACIT-fatigue questionnaire.  
36 An MCID in HRQoL is defined as a 6 points change on an individual level (15). HRQoL is  
37 assessed at baseline, 12-week post-intervention and at time of disease progression on allocated  
38 treatment.  
39  
40

### 41 *Body composition*

42 Fat mass, body fat %, visceral adipose tissue volume (VAT), subcutaneous adipose tissue volume  
43 (SAT) and lean body mass (LBM) are obtained using dual energy X-ray absorptiometry (DXA)  
44 whole body fan-beam scans (Hologic Discovery, Bedford, Massachusetts, USA) with the software  
45 APEX 4.0. VAT and SAT are measured in a 5 cm wide horizontal slice across the abdomen from  
46 the iliac crest to the L4-L5 segment (16,17). Weight (BWB-800A, TANITA, Tokyo, Japan) and  
47 body mass index (height in meters<sup>2</sup>/weight in kilograms) is assessed as well. Systolic and diastolic  
48 blood pressure is measured on the right arm after at least 20 minutes of rest (BP A3 Plus, Microlife  
49 AG, Widnau, Switzerland).  
50  
51

### 52 *OGTT*

53 The first 60 participants undergo a two-hour oral glucose (75 g) tolerance test (OGTT) after at least  
54 9 hours of fasting. Plasma glucose and insulin are measured after 0, 30, 60 and 120 minutes. The  
55 whole body insulin sensitivity index (Matsuda index) are calculated from plasma glucose and  
56 insulin concentrations attained from the two-hour OGTT in the subgroup of 60 participants (18).  
57 The equation for calculating the Matsuda index is:  $10.000/\sqrt{(FPG \times FPI \times \text{mean PG} \times \text{mean PI})}$ .  
58  
59  
60

1  
2  
3  
4 FPG is the fasting plasma glucose and FPI is the fasting plasma insulin concentration. Fasting  
5 plasma glucose and insulin are measured in all 170 participants. Fasting insulin resistance is  
6 calculated from the basal glucose and insulin concentrations using the homeostatic model  
7 assessment (HOMA-IR) with following equation:  $(FPG \times FPI)/22.5$  (19).  
8  
9

#### 10 *Biochemical assays*

11 All blood samples are drawn before 10 am after a minimum of 9 hours of fasting.  
12

#### 13 *Metabolic analyses*

14 Plasma glucose is analysed with an enzymatic assay (Vitros 5.1, Ortho-Clinical Diagnostics, USA).  
15 Plasma insulin is analysed with a sandwich chemiluminescence immunoassay (ADVIA Centaur  
16 XP, Siemens, Germany). Glycated haemoglobin (HbA1c) is measured by high-performance liquid  
17 chromatography (Variant II TURBO, Bio-RAD, USA). Triglycerides, total cholesterol, HDL  
18 cholesterol, LDL cholesterol and VLDL cholesterol are assayed by an enzymatic technique (Vitros  
19 5.1 FS, Ortho-Clinical Diagnostics, USA). C reactive protein is analysed with a latex-enhanced  
20 immuno-turbidimetric test (Atellica CH 930, Siemens, Germany).  
21  
22

#### 23 *Androgen treatment response*

24 Serum total testosterone, androstenedione, dehydroepiandrosterone sulphate (DHEAS) and 17-  
25 hydroxyprogesterone are measured by Liquid chromatography – tandem mass spectrometry  
26 (Acquity UPLC Xevo™ TQ MS, Waters, USA). Sex hormone binding globulin (SHBG) is  
27 analysed by a competitive chemiluminescence based immunoassay (Cobas, Roche Diagnostics,  
28 Mannheim, Germany). Plasma Luteinizing hormone (LH) and follicle stimulating hormone (FSH)  
29 are measured using sandwich chemiluminescence immunoassay (ADVIA Centaur®, Siemens,  
30 Germany).  
31  
32

#### 33 *Additional measurements*

##### 34 *Common terminology criteria for adverse events*

35 Adverse events will be registered at the 12-week post-intervention visit, using the common  
36 terminology criteria for adverse events version 4 (20).  
37

##### 38 *Metabolic biomarkers*

39 Samples of full blood and serum are prospectively collected at baseline and 12-week post-  
40 intervention for future assessment of cardiac, adipose and inflammatory biomarkers.  
41

##### 42 *Genetic biomarkers*

43 A biobank is generated during the trial and will be used for a future prospective, observational study  
44 assessing the predictive and prognostic value of genetic biomarkers in circulating cell-free DNA  
45 (ccfDNA). Samples from blood and urine are prospectively collected at baseline and at time of  
46 disease progression on allocated treatment. Somatic alterations will be analysed from ccfDNA in  
47 plasma, urine pellets and supernatant.  
48  
49  
50  
51  
52  
53

#### 54 **Patient and public involvement**

55 The patients treated with enzalutamide and AAP inspired us to the design of the trial's research  
56 question and outcomes, by sharing their experience of the treatment and associated side-effects in  
57 the out-patient clinic of Herlev and Gentofte Hospital. Fatigue is the primary outcome of the trial,  
58  
59  
60

1  
2  
3  
4 since fatigue is the most common and distressing symptom experienced by patients with mCRPC  
5 (21). The burden of the intervention is partly assessed by patient-reported questionnaires assessing  
6 fatigue and HRQoL. Patients were not involved in the recruitment to or conduct of the trial. The  
7 results of the trial will be made publicly available through the homepage of Herlev and Gentofte  
8 Hospital.  
9

### 10 11 **Sample size and statistical analysis**

12 The sample size calculation is based on the detection of a between-group MCID of 3.0 points on the  
13 FACIT-Fatigue scale, with an anticipated drop-out of 10% (14). The standard deviation is assumed  
14 to be 6.55, based on confidence limits from previous studies assessing fatigue in men with  
15 metastatic prostate cancer (22–24). The sample size calculation is based on a two-tailed significance  
16 level of 5% and a power of 80%. This required a sample size of 85 participants in each group, a  
17 total of 170 men.  
18  
19

20 The within-subject and between-group differences of the primary and secondary endpoints will be  
21 analysed with linear mixed effect models using constrained longitudinal analysis (cLDA). The  
22 between-group MCID in fatigue and HRQoL will be analysed with risk difference. An MCID in  
23 fatigue is defined as an individual 3-point change in the FACIT-Fatigue total score. An MCID in  
24 HRQoL is defined as an individual 6-point change in FACT-P total score. Interactions between  
25 patient reported outcomes (fatigue and quality of life), and age (< 75 versus ≥75 years) and extent  
26 of metastases (high versus low volume disease) will be tested in sub-group analyses using forest  
27 plots. High volume disease is defined as ≥ 4 bone metastases with ≥ 1 bone metastases outside  
28 pelvis and column. Interactions between metabolic changes, and BMI (<30 versus ≥ 30) and age  
29 (<75 years versus ≥ 75) will be analysed in sub-group analyses using forest plots. The linear mixed  
30 effect model using cLDA handles random missing data.  
31  
32  
33

### 34 35 **Ethics and dissemination**

36 Participants will receive standard first-line treatment for mCRPC. The primary investigator obtains  
37 the written informed consent from all participants. The trial follows the ICH-GCP guidelines for  
38 good clinical practice, the latest revision of the Declaration of Helsinki and the Danish rules on  
39 Clinical Trials of Medicines in Humans. This trial is approved by the National Committee on  
40 Health Research Ethics (H-17001347), Danish Data Protection Agency (2012-58-0004) and Danish  
41 Medicines Agency (EudraCT no.: 2017-000027-99, [www.clinicaltrialsregister.eu](http://www.clinicaltrialsregister.eu)). The trial is  
42 externally monitored by Good Clinical Practice Unit, Copenhagen University. The trial's results  
43 will be published in peer-reviewed international journals or otherwise made publicly available and  
44 will be presented at national and international conferences and symposiums irrespective of the  
45 outcomes. Patient reported outcome, metabolic changes, hormone analyses and genetic biomarkers  
46 will be reported in separate publications. Study completion is expected by spring 2020, and  
47 dissemination of the results will begin as soon as possible thereafter.  
48  
49  
50

### 51 52 **Discussion**

53 This article describes the protocol of an ongoing randomised clinical trial comparing fatigue,  
54 HRQoL and metabolic changes in men with mCRPC treated with first-line enzalutamide versus  
55 AAP.  
56

57 We chose fatigue as the primary endpoint since it is the most common and distressing symptom  
58 affecting HRQoL in men with mCRPC (3,5,25,26). We assess changes in patient reported fatigue  
59  
60

1  
2  
3  
4 with the validated 13-question questionnaire FACIT-Fatigue. Previous randomised clinical trials on  
5 enzalutamide and AAP measured the level of fatigue with Common Terminology Criteria for  
6 Adverse Event with a coarse three-level grading, from fatigue “relieved by rest” to fatigue “limiting  
7 self-care” (3,5). We expect that changes in fatigue will be reported more accurately from patients  
8 using the 13-question questionnaires in contrast to the physician reported three-level grading used  
9 in previously trials. We did not choose to assess fatigue by interviews since that would preclude a  
10 statistical comparison of changes in fatigue, even though interviews might yield a more individual  
11 assessment of fatigue.  
12  
13

14  
15 We chose to assess changes in patient reported HRQoL with the 39-question questionnaire  
16 FACT-P, because FACT-P is developed and validated for assessing HRQoL in men with prostate  
17 cancer. Changed HRQoL for men with metastatic prostate cancer has previously been measured  
18 with FACT-P in randomized clinical trials, and the results can therefore be compared with existing  
19 literature (27–29).  
20

21  
22 We chose to comprehensively assess metabolic changes, including glucose metabolism measured  
23 with oral glucose tolerance test and HbA1c, and body composition measured with DXA scans.  
24 Previous randomised clinical trials on enzalutamide and abiraterone have measured following  
25 metabolic adverse events: plasma glucose, weight, and blood pressure (3–6). We did not choose to  
26 measure plasma glucose, because the within-subject plasma glucose varies widely, and fasting  
27 plasma glucose alone fails to diagnose approximately 30% of cases of previously undiagnosed  
28 diabetes (30,31). We chose to assess glucose metabolism with OGTT and HbA1c because the  
29 hyperglycaemic disease process is a risk factor for microvascular complications, diabetes and  
30 cardiovascular disease and may be present without fulfilling the criteria for diabetes (30). We chose  
31 to measure BMI and body composition with DXA scans because both methods can identify obesity  
32 and associated metabolic and cardiovascular risks,(32–34) while DXA scans can identify body fat  
33 which may be a better predictor of metabolic syndrome than BMI alone (35,36). We measure lean  
34 body mass with DXA scans, because a loss of lean mass can over time contribute to a decrease in  
35 muscle strength which are important predictors of balance, the occurrence of falls and mortality  
36 (37,38).  
37  
38

39  
40 We chose 3-month follow-up to evaluate the treatments side effects and at the same time to avoid a  
41 pronounced influence of disease progression on HRQoL and fatigue. In a cohort study of 21  
42 participants metabolic changes appeared already after 7 to 10 days of treatment with low-dose  
43 prednisolone (6 mg/day) (39). Changes in fatigue and HRQoL can be experienced within the first  
44 three months of treatment with new androgen pathway inhibitors (27). The median time until  
45 biochemical progression was 11.1 and 11.2 months for men with mCRPC treated with AAP and  
46 enzalutamide, respectively (3,5). However, 14% (74/546) had biochemical progression after only 3  
47 months' treatment with AAP; and 8% (70/854) had biochemical progression after 3 months'  
48 treatment with enzalutamide (3,5).  
49

50  
51 The lack of blinding can be perceived as a weakness, but we find that it is of minor importance and  
52 unlikely to affect the objectively measured outcomes. Blood samples are analysed in an  
53 independent laboratory, DXA scans are analysed with the same software and outcomes on fatigue  
54 and HRQoL are reported by participants.  
55  
56  
57  
58  
59  
60

1  
2  
3  
4  
5  
6  
7  
8  
9  
10  
11  
12  
13  
14  
15  
16  
17  
18  
19  
20  
21  
22  
23  
24  
25  
26  
27  
28  
29  
30  
31  
32  
33  
34  
35  
36  
37  
38  
39  
40  
41  
42  
43  
44  
45  
46  
47  
48  
49  
50  
51  
52  
53  
54  
55  
56  
57  
58  
59  
60

**Conclusion**

The aim of this trial is to assess differences in the patient reported and metabolic side effects of enzalutamide and AAP. The results may in the future help patients and physicians to choose the best tolerated treatment and thereby reduce treatment induced morbidity and improve quality of life.

For peer review only



## References

1. Potter G a, Barrie SE, Jarman M, et al. Novel steroidal inhibitors of human cytochrome P45017 alpha (17 alpha-hydroxylase-C17,20-lyase): potential agents for the treatment of prostatic cancer. *J Med Chem*. 1995;38(13):2463–71.
2. Auchus RJ, Yu MK, Nguyen S, et al. Use of Prednisone With Abiraterone Acetate in Metastatic Castration-Resistant Prostate Cancer. *Oncologist*. 2014;
3. Ryan CJ, Smith MR, de Bono JS, et al. Abiraterone in metastatic prostate cancer without previous chemotherapy. *N Engl J Med* [Internet]. 2013 Jan 10;368(2):138–48. Available from: <http://www.ncbi.nlm.nih.gov/pubmed/29137449>
4. Rathkopf DE, Smith MR, de Bono JS, et al. Updated interim efficacy analysis and long-term safety of abiraterone acetate in metastatic castration-resistant prostate cancer patients without prior chemotherapy (COU-AA-302). *Eur Urol* [Internet]. 2014 Nov;66(5):815–25. Available from: <http://www.ncbi.nlm.nih.gov/pubmed/24647231>
5. Beer TM, Armstrong AJ, Rathkopf DE, et al. Enzalutamide in metastatic prostate cancer before chemotherapy. *N Engl J Med* [Internet]. 2014 Jul 31;371(5):424–33. Available from: <http://www.ncbi.nlm.nih.gov/pubmed/29137449>
6. Evans CP, Higano CS, Keane T, et al. The PREVAIL Study: Primary Outcomes by Site and Extent of Baseline Disease for Enzalutamide-treated Men with Chemotherapy-naïve Metastatic Castration-resistant Prostate Cancer. *Eur Urol* [Internet]. 2016 Mar 19;70(4):675–83. Available from: <http://linkinghub.elsevier.com/retrieve/pii/S0302283816002748%5Cnhttp://www.ncbi.nlm.nih.gov/pubmed/27006332>
7. Storey DJ, McLaren DB, Atkinson MA, et al. Clinically relevant fatigue in men with hormonesensitive prostate cancer on long-term androgen deprivation therapy. *Ann Oncol*. 2012;
8. Østergren PB, Kistorp C, Bennedbak FN, et al. The use of exercise interventions to overcome adverse effects of androgen deprivation therapy. *Nature Reviews Urology*. 2016.
9. Moreira RB, Debiasi M, Francini E, et al. Differential Side Effects Profile in mCRPC Patients Treated With Abiraterone or Enzalutamide: A Meta-Analysis of Randomized Controlled Trials. *Clin Adv Hematol Oncol* [Internet]. 2016 Apr;14(4 Suppl 5):14–5. Available from: <http://www.ncbi.nlm.nih.gov/pubmed/27167845>
10. Davis ID, Martin AJ, Stockler MR, et al. Enzalutamide with Standard First-Line Therapy in Metastatic Prostate Cancer. *N Engl J Med* [Internet]. 2019;381(2):121–31. Available from: <http://www.ncbi.nlm.nih.gov/pubmed/31157964>
11. James ND, de Bono JS, Spears MR, et al. Abiraterone for Prostate Cancer Not Previously Treated with Hormone Therapy. *N Engl J Med* [Internet]. 2017;377(4):338–51. Available from: <http://www.nejm.org/doi/10.1056/NEJMoa1702900>
12. Fizazi K, Tran N, Fein L, et al. Abiraterone plus Prednisone in Metastatic, Castration-Sensitive Prostate Cancer. *N Engl J Med* [Internet]. 2017;377(4):352–60. Available from: <http://www.nejm.org/doi/10.1056/NEJMoa1704174>
13. Scher HI, Morris MJ, Stadler WM, et al. Trial design and objectives for castration-resistant prostate cancer: Updated recommendations from the prostate cancer clinical trials working group 3 [Internet]. Vol. 34, *Journal of Clinical Oncology*. 2016. p. 1402–18. Available from: <http://jco.ascopubs.org/content/34/12/1402.full.pdf+html%5Cnhttp://ovidsp.ovid.com/ovidweb.cgi?T=JS&PAGE=reference&D=emed18a&NEWS=N&AN=609745695>
14. Cella D, Eton DT, Lai JS, et al. Combining anchor and distribution-based methods to derive minimal clinically important differences on the Functional Assessment of Cancer Therapy (FACT) anemia and fatigue scales. *J Pain Symptom Manage*. 2002;24(6):547–61.
15. Cella D, Nichol MB, Eton D, et al. Estimating clinically meaningful changes for the Functional Assessment of Cancer Therapy--Prostate: results from a clinical trial of patients with metastatic hormone-refractory prostate cancer. *Value Health* [Internet]. 2008;12(1):124–9. Available from: <http://www.ncbi.nlm.nih.gov/pubmed/18647260>
16. Bredella MA, Gill CM, Keating LK, et al. Assessment of abdominal fat compartments using DXA in premenopausal women from anorexia nervosa to morbid obesity. *Obesity*. 2013;21(12):2458–64.
17. Micklesfield LK, Goedecke JH, Punyanitya M, et al. Dual-energy X-ray performs as well as clinical computed tomography for the measurement of visceral fat. *Obesity*. 2012;20(5):1109–14.
18. Matsuda M, DeFronzo RA. Insulin Sensitivity Indices Obtained From Oral Glucose Tolerance Testing. *Diabetes Care*. 1999;22(9).
19. Patarrão RS, Wayne Lutt W, Paula Macedo M. Assessment of methods and indexes of insulin sensitivity. *Rev*

1  
2  
3  
4  
5  
6  
7  
8  
9  
10  
11  
12  
13  
14  
15  
16  
17  
18  
19  
20  
21  
22  
23  
24  
25  
26  
27  
28  
29  
30  
31  
32  
33  
34  
35  
36  
37  
38  
39  
40  
41  
42  
43  
44  
45  
46  
47  
48  
49  
50  
51  
52  
53  
54  
55  
56  
57  
58  
59  
60

- Port Endocrinol Diabetes e Metab. 2014;
20. Services H. Common Terminology Criteria for Adverse Events (CTCAE) version 4.0. Publish. 2010;
  21. Colloca G, Venturino A, Governato I, et al. Incidence and Correlates of Fatigue in Metastatic Castration-Resistant Prostate Cancer: A Systematic Review. Vol. 14, *Clinical Genitourinary Cancer*. 2016. p. 5–11.
  22. Cormie P, Galvão DA, Spry N, et al. Can supervised exercise prevent treatment toxicity in patients with prostate cancer initiating androgen-deprivation therapy: A randomised controlled trial. *BJU Int*. 2015;115(2):256–66.
  23. Bourke L, Gilbert S, Hooper R, et al. Lifestyle changes for improving disease-specific quality of life in sedentary men on long-term androgen-deprivation therapy for advanced prostate cancer: A randomised controlled trial. *Eur Urol*. 2014;65(5):865–72.
  24. Bourke L, Doll H, Crank H, et al. Lifestyle intervention in men with advanced prostate cancer receiving androgen suppression therapy: a feasibility study. *Cancer Epidemiol Biomarkers Prev* [Internet]. 2011;20(4):647–57. Available from: <http://www.ncbi.nlm.nih.gov/pubmed/21335510>
  25. Slovin S, Clark W, Carles J, et al. Seizure rates in enzalutamide-treated men with metastatic castration-resistant prostate cancer and risk of seizure: The UPWARD study. *JAMA Oncol*. 2018;
  26. Salem S, Komisarenko M, Timilshina N, et al. Impact of Abiraterone Acetate and Enzalutamide on Symptom Burden of Patients with Chemotherapy-naïve Metastatic Castration-resistant Prostate Cancer. *Clin Oncol (R Coll Radiol)* [Internet]. 2017 Sep;29(9):601–8. Available from: <http://www.ncbi.nlm.nih.gov/pubmed/28395931>
  27. Khalaf DJ, Sunderland K, Eigl BJ, et al. Health-related Quality of Life for Abiraterone Plus Prednisone Versus Enzalutamide in Patients with Metastatic Castration-resistant Prostate Cancer: Results from a Phase II Randomized Trial. *Eur Urol* [Internet]. 2018 Dec 24; Available from: <http://www.ncbi.nlm.nih.gov/pubmed/30591354>
  28. Basch E, Autio K, Ryan CJ, et al. Abiraterone acetate plus prednisone versus prednisone alone in chemotherapy-naïve men with metastatic castration-resistant prostate cancer: Patient-reported outcome results of a randomised phase 3 trial. *Lancet Oncol*. 2013;
  29. Loriot Y, Miller K, Sternberg CN, et al. Effect of enzalutamide on health-related quality of life, pain, and skeletal-related events in asymptomatic and minimally symptomatic, chemotherapy-naïve patients with metastatic castration-resistant prostate cancer (PREVAIL): Results from a randomised, p. *Lancet Oncol*. 2015;
  30. Diabetes DOF, American Diabetes Association. Diagnosis and classification of diabetes mellitus. *Diabetes Care*. 2009;
  31. World Health Organisation (WHO), International Diabetes Federation (IDF). Definition and Diagnosis of Diabetes Mellitus and Intermediate Hyperglycemia. *World Heal Organ*. 2006;
  32. Obesity: preventing and managing the global epidemic. Report of a WHO consultation. *World Heal Organ - Tech Rep Ser*. 2000;
  33. Lang PO, Trivalle C, Vogel T, et al. Markers of metabolic and cardiovascular health in adults: Comparative analysis of DEXA-based body composition components and BMI categories. *J Cardiol*. 2015;
  34. Zhu S, Wang ZM, Shen W, et al. Percentage body fat ranges associated with metabolic syndrome risk: Results based on the third National Health and Nutrition Examination Survey (1988-1994). *American Journal of Clinical Nutrition*. 2003.
  35. Liu P, Ma F, Lou H, et al. The utility of fat mass index vs. body mass index and percentage of body fat in the screening of metabolic syndrome. *BMC Public Health*. 2013;
  36. Gómez-Ambrosi J, Silva C, Galofré JC, et al. Body mass index classification misses subjects with increased cardiometabolic risk factors related to elevated adiposity. *Int J Obes*. 2012;
  37. Lee CG, Boyko EJ, Nielson CM, et al. Mortality risk in older men associated with changes in weight, lean mass, and fat mass. *J Am Geriatr Soc*. 2011;
  38. Wolfson L, Judge J, Whipple R, et al. Strength is a major factor in balance, gait, and the occurrence of falls. *J Gerontol A Biol Sci Med Sci*. 1995;
  39. Petersons CJ, Mangelsdorf BL, Jenkins AB, et al. Effects of low-dose prednisolone on hepatic and peripheral insulin sensitivity, insulin secretion, and abdominal adiposity in patients with inflammatory rheumatologic disease. *Diabetes Care*. 2013;36(9):2822–9.

## Contributions

KKT, PBØ, JS, CK, HL, MF, GP and RB participated in the design of the study. KKT conceived the study and participated in its design and coordination. KKT and PBØ drafted the study protocol. KKT drafted the manuscript and all authors read and approved the final manuscript.

## Acknowledgement

We want to thank the patients, treated with enzalutamide and AAP at Herlev and Gentofte Hospital, for inspiring us to design this trial by openly sharing their experience of their treatment and associated side-effects.

## Funding statement

Jens Sønksen, trial sponsor, PhD, DMSci, Chair Professor of Urology

Mail: [Jens.Soenksen@regionh.dk](mailto:Jens.Soenksen@regionh.dk)

This work was supported by SPCG Clinical Research Grant 2017 and the internal research fund of Herlev and Gentofte Hospital.

## Competing interests statement

The authors have following conflicts of interest:

PBØ is speaker for Astellas, Ipsen and Ferring.

MF is speaker for Ferring and Astellas and advisory board representative for Astellas.

HL is advisory board representative for Roche, Janssen, Astellas, Bayer and Sanofi-Aventis.

## Tables

*Table 1. Inclusion and exclusion criteria*

| Inclusion criteria                                                                                                                                                                                                                                                                                                                                                                                                                                                                                                                                                                                                                                                                                                                                                                                                                                                                                                                                                                                                                                                                                                                                                                                                                                                                                                                                                                                                                                                                                                                                                                                               | Exclusion criteria                                                                                                                                                                                                                                                                                                                                                                                                                                                                                                                                                                                                                                                                                                                                                                                                                                                                                                                                                                                                                                                                                                                      |
|------------------------------------------------------------------------------------------------------------------------------------------------------------------------------------------------------------------------------------------------------------------------------------------------------------------------------------------------------------------------------------------------------------------------------------------------------------------------------------------------------------------------------------------------------------------------------------------------------------------------------------------------------------------------------------------------------------------------------------------------------------------------------------------------------------------------------------------------------------------------------------------------------------------------------------------------------------------------------------------------------------------------------------------------------------------------------------------------------------------------------------------------------------------------------------------------------------------------------------------------------------------------------------------------------------------------------------------------------------------------------------------------------------------------------------------------------------------------------------------------------------------------------------------------------------------------------------------------------------------|-----------------------------------------------------------------------------------------------------------------------------------------------------------------------------------------------------------------------------------------------------------------------------------------------------------------------------------------------------------------------------------------------------------------------------------------------------------------------------------------------------------------------------------------------------------------------------------------------------------------------------------------------------------------------------------------------------------------------------------------------------------------------------------------------------------------------------------------------------------------------------------------------------------------------------------------------------------------------------------------------------------------------------------------------------------------------------------------------------------------------------------------|
| <ul style="list-style-type: none"> <li>• Eligible for first line treatment with either enzalutamide or abiraterone acetate plus prednisolone as per standard of care guidelines</li> <li>• Age 18-90 years</li> <li>• Willing, capable and legally competent individuals</li> <li>• ECOG performance status 0-1</li> <li>• Histologically confirmed adenocarcinoma of the prostate</li> <li>• Prior surgical orchiectomy or if on LHRH agonist/antagonist, then testosterone &lt; 1.7 nmol/L at screening visit (participants must maintain LHRH agonist/antagonist therapy for duration of study treatment if not surgically castrated)</li> <li>• Evidence of metastatic disease on bone scan or CT scan</li> <li>• Evidence of biochemical or imaging progression in the setting of surgical or medical castration. Progressive disease for study entry is defined by one of the following criteria based on criteria of PCWG3: <ul style="list-style-type: none"> <li>○ Biochemical progression: Obtain sequence of rising PSA values at a minimum of 1-week intervals, resulting in increases over the nadir, with PSA &gt; 1 ng/mL</li> <li>○ Radiological progression: <ul style="list-style-type: none"> <li>▪ The appearance of two or more new bone lesions on bone imaging</li> <li>▪ Enlargement of a soft tissue lesion using the modified RECIST 1.1.</li> </ul> </li> </ul> </li> <li>• Adequate organ function defined as: <ul style="list-style-type: none"> <li>○ Creatinine &lt; 1,5 x ULN</li> <li>○ Total bilirubin &lt; 1,5 x ULN</li> <li>○ ALT or AST ≤ 2,5 x ULN</li> </ul> </li> </ul> | <ul style="list-style-type: none"> <li>• Inability to understand and/or stick to the written information</li> <li>• Previous treatment with docetaxel, with the exception of previous treatment with early docetaxel (≤ 6 series) ≥ 6 months before inclusion.</li> <li>• Diagnosed with diabetes mellitus and/or HbA1C &gt; 48 mmol/mol.</li> <li>• Hypersensitivity towards components in abiraterone acetate plus prednisolone or enzalutamide</li> <li>• Ongoing treatment with high doses of glucocorticoids</li> <li>• Severe concurrent illness or co-morbid disease that would make the subject unsuitable for enrolment</li> <li>• Prior therapy with CYP17 inhibitors. enzalutamide or other experimental anti-androgens</li> <li>• Life expectancy &lt; 6 months</li> <li>• Active concurrent malignancy</li> <li>• Treatment with Radium-223</li> <li>• Known brain metastases</li> <li>• Liver or lung metastases on CT-scanning.</li> <li>• History of seizure or seizure disorder, or history of cerebrovascular stroke within 6 months of study entry.</li> <li>• Known cardiac failure (&gt; NYHA class II)</li> </ul> |

ECOG, Eastern Cooperative Oncology Group. LHRH, luteinizing hormone-releasing hormone. CT, computed tomography. PCWG3, prostate cancer working group 3. RECIST, Response Evaluation Criteria in Solid Tumors. ULN, upper limit of normal. ALT, Alanine aminotransferase. AST, aspartate aminotransferase. HbA1C, Glycated haemoglobin. NYHA, New York Heart Association.

Table 2. Schedule of enrolment, interventions, and assessments.

| Visit                                         | Randomization and enrollment | Baseline visit | 12-week follow-up | Follow-up at time of disease progression |
|-----------------------------------------------|------------------------------|----------------|-------------------|------------------------------------------|
| <b>Time (weeks from treatment initiation)</b> | <b>-4± 2</b>                 | <b>0</b>       | <b>+12 ± 2</b>    | <b>+ 10 until the year 2023</b>          |
| Written informed consent                      | X                            |                |                   |                                          |
| Medical history                               | X                            |                |                   |                                          |
| Medication list                               | X                            | X              | X                 |                                          |
| ECOG Performance status                       | X                            | X              | X                 |                                          |
| <b>Physical</b>                               |                              |                |                   |                                          |
| Height                                        |                              | X              |                   |                                          |
| Blood pressure, weight, BMI                   |                              | X              | X                 |                                          |
| <b>Questionnaires</b>                         |                              |                |                   |                                          |
| FACIT-Fatigue                                 |                              | X              | X                 | X                                        |
| FACT-P                                        |                              | X              | X                 | X                                        |
| <b>Samples</b>                                |                              |                |                   |                                          |
| Blood samples                                 |                              | X              | X                 | X                                        |
| Urine sample                                  |                              | X              |                   | X                                        |
| <b>Other paraclinical examinations</b>        |                              |                |                   |                                          |
| DXA scan                                      |                              | X              | X                 |                                          |
| OGTT (only the first 60 participants)         |                              | X              | X                 |                                          |
| <b>Safety</b>                                 |                              |                |                   |                                          |
| Adverse Events                                |                              |                | X                 |                                          |

ECOG, Eastern Cooperative Oncology Group. BMI, Body Mass Index, FACIT-Fatigue, Functional Assessment of Chronic Illness Therapy-Fatigue. FACT-P, Functional Assessment of Cancer Therapy-Prostate. DXA, dual energy X-ray absorptiometry. OGTT, Oral Glucose Tolerance Test.

1  
2  
3  
4  
5  
6  
7  
8  
9  
10  
11  
12  
13  
14  
15  
16  
17  
18  
19  
20  
21  
22  
23  
24  
25  
26  
27  
28  
29  
30  
31  
32  
33  
34  
35  
36  
37  
38  
39  
40  
41  
42  
43  
44  
45  
46  
47  
48  
49  
50  
51  
52  
53  
54  
55  
56  
57  
58  
59  
60

**Figure legends**

*Figure 1. Timeline from screening to intervention*

For peer review only

**Figure**

*Figure 1. Timeline from screening to intervention*

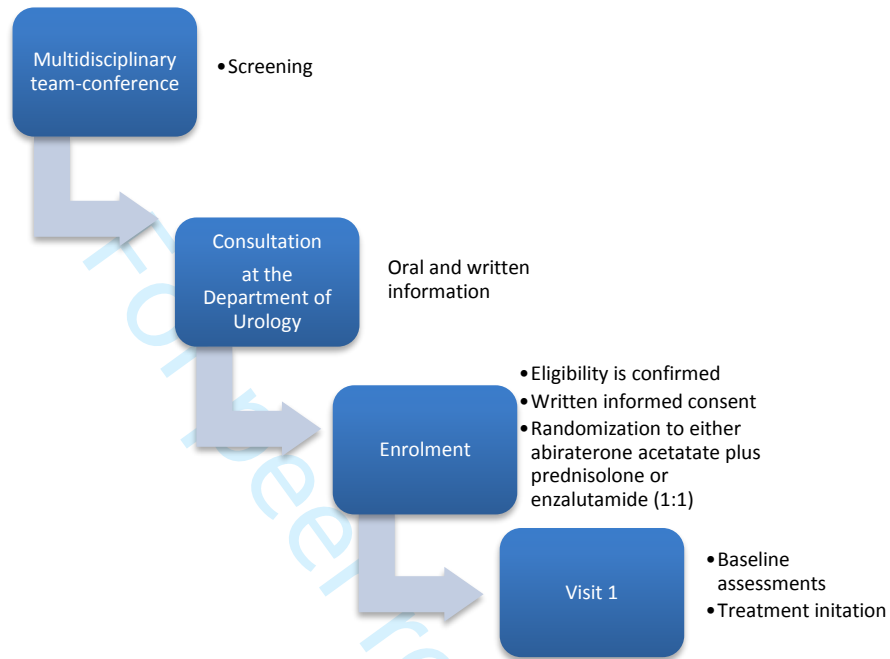

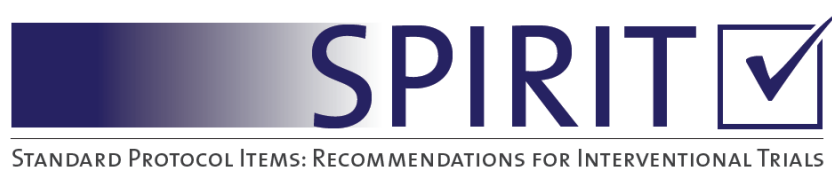

SPIRIT 2013 Checklist: Recommended items to address in a clinical trial protocol and related documents\*

| Section/item                      | Item No | Description                                                                                                                                                                                                                                                                              | Page |
|-----------------------------------|---------|------------------------------------------------------------------------------------------------------------------------------------------------------------------------------------------------------------------------------------------------------------------------------------------|------|
| <b>Administrative information</b> |         |                                                                                                                                                                                                                                                                                          |      |
| Title                             | 1       | Descriptive title identifying the study design, population, interventions, and, if applicable, trial acronym                                                                                                                                                                             | 1    |
| Trial registration                | 2a      | Trial identifier and registry name. If not yet registered, name of intended registry                                                                                                                                                                                                     | 2    |
|                                   | 2b      | All items from the World Health Organization Trial Registration Data Set                                                                                                                                                                                                                 |      |
| Protocol version                  | 3       | Date and version identifier                                                                                                                                                                                                                                                              | 1    |
| Funding                           | 4       | Sources and types of financial, material, and other support                                                                                                                                                                                                                              | 10   |
| Roles and responsibilities        | 5a      | Names, affiliations, and roles of protocol contributors                                                                                                                                                                                                                                  | 1+10 |
|                                   | 5b      | Name and contact information for the trial sponsor                                                                                                                                                                                                                                       | 10   |
|                                   | 5c      | Role of study sponsor and funders, if any, in study design; collection, management, analysis, and interpretation of data; writing of the report; and the decision to submit the report for publication, including whether they will have ultimate authority over any of these activities | 10   |
|                                   | 5d      | Composition, roles, and responsibilities of the coordinating centre, steering committee, endpoint adjudication committee, data management team, and other individuals or groups overseeing the trial, if applicable (see Item 21a for data monitoring committee)                         | NR   |
| <b>Introduction</b>               |         |                                                                                                                                                                                                                                                                                          |      |
| Background and rationale          | 6a      | Description of research question and justification for undertaking the trial, including summary of relevant studies (published and unpublished) examining benefits and harms for each intervention                                                                                       | 3    |
|                                   | 6b      | Explanation for choice of comparators                                                                                                                                                                                                                                                    | 3    |
| Objectives                        | 7       | Specific objectives or hypotheses                                                                                                                                                                                                                                                        | 3    |



|    |                                                           |     |                                                                                                                                                                                                                                                                                                                                                                                |        |
|----|-----------------------------------------------------------|-----|--------------------------------------------------------------------------------------------------------------------------------------------------------------------------------------------------------------------------------------------------------------------------------------------------------------------------------------------------------------------------------|--------|
| 1  |                                                           |     |                                                                                                                                                                                                                                                                                                                                                                                |        |
| 2  |                                                           |     |                                                                                                                                                                                                                                                                                                                                                                                |        |
| 3  |                                                           |     |                                                                                                                                                                                                                                                                                                                                                                                |        |
| 4  |                                                           |     |                                                                                                                                                                                                                                                                                                                                                                                |        |
| 5  |                                                           |     |                                                                                                                                                                                                                                                                                                                                                                                |        |
| 6  |                                                           |     |                                                                                                                                                                                                                                                                                                                                                                                |        |
| 7  |                                                           |     |                                                                                                                                                                                                                                                                                                                                                                                |        |
| 8  |                                                           |     |                                                                                                                                                                                                                                                                                                                                                                                |        |
| 9  |                                                           |     |                                                                                                                                                                                                                                                                                                                                                                                |        |
| 10 |                                                           |     |                                                                                                                                                                                                                                                                                                                                                                                |        |
| 11 |                                                           |     |                                                                                                                                                                                                                                                                                                                                                                                |        |
| 12 |                                                           |     |                                                                                                                                                                                                                                                                                                                                                                                |        |
| 13 |                                                           |     |                                                                                                                                                                                                                                                                                                                                                                                |        |
| 14 |                                                           |     |                                                                                                                                                                                                                                                                                                                                                                                |        |
| 15 |                                                           |     |                                                                                                                                                                                                                                                                                                                                                                                |        |
| 16 |                                                           |     |                                                                                                                                                                                                                                                                                                                                                                                |        |
| 17 |                                                           |     |                                                                                                                                                                                                                                                                                                                                                                                |        |
| 18 |                                                           |     |                                                                                                                                                                                                                                                                                                                                                                                |        |
| 19 |                                                           |     |                                                                                                                                                                                                                                                                                                                                                                                |        |
| 20 |                                                           |     |                                                                                                                                                                                                                                                                                                                                                                                |        |
| 21 |                                                           |     |                                                                                                                                                                                                                                                                                                                                                                                |        |
| 22 |                                                           |     |                                                                                                                                                                                                                                                                                                                                                                                |        |
| 23 |                                                           |     |                                                                                                                                                                                                                                                                                                                                                                                |        |
| 24 |                                                           |     |                                                                                                                                                                                                                                                                                                                                                                                |        |
| 25 |                                                           |     |                                                                                                                                                                                                                                                                                                                                                                                |        |
| 26 |                                                           |     |                                                                                                                                                                                                                                                                                                                                                                                |        |
| 27 |                                                           |     |                                                                                                                                                                                                                                                                                                                                                                                |        |
| 28 |                                                           |     |                                                                                                                                                                                                                                                                                                                                                                                |        |
| 29 |                                                           |     |                                                                                                                                                                                                                                                                                                                                                                                |        |
| 30 |                                                           |     |                                                                                                                                                                                                                                                                                                                                                                                |        |
| 31 |                                                           |     |                                                                                                                                                                                                                                                                                                                                                                                |        |
| 32 |                                                           |     |                                                                                                                                                                                                                                                                                                                                                                                |        |
| 33 |                                                           |     |                                                                                                                                                                                                                                                                                                                                                                                |        |
| 34 |                                                           |     |                                                                                                                                                                                                                                                                                                                                                                                |        |
| 35 |                                                           |     |                                                                                                                                                                                                                                                                                                                                                                                |        |
| 36 |                                                           |     |                                                                                                                                                                                                                                                                                                                                                                                |        |
| 37 |                                                           |     |                                                                                                                                                                                                                                                                                                                                                                                |        |
| 38 |                                                           |     |                                                                                                                                                                                                                                                                                                                                                                                |        |
| 39 |                                                           |     |                                                                                                                                                                                                                                                                                                                                                                                |        |
| 40 |                                                           |     |                                                                                                                                                                                                                                                                                                                                                                                |        |
| 41 |                                                           |     |                                                                                                                                                                                                                                                                                                                                                                                |        |
| 42 |                                                           |     |                                                                                                                                                                                                                                                                                                                                                                                |        |
| 43 |                                                           |     |                                                                                                                                                                                                                                                                                                                                                                                |        |
| 44 |                                                           |     |                                                                                                                                                                                                                                                                                                                                                                                |        |
| 45 |                                                           |     |                                                                                                                                                                                                                                                                                                                                                                                |        |
| 46 |                                                           |     |                                                                                                                                                                                                                                                                                                                                                                                |        |
| 47 |                                                           |     |                                                                                                                                                                                                                                                                                                                                                                                |        |
| 48 |                                                           |     |                                                                                                                                                                                                                                                                                                                                                                                |        |
| 49 |                                                           |     |                                                                                                                                                                                                                                                                                                                                                                                |        |
| 50 |                                                           |     |                                                                                                                                                                                                                                                                                                                                                                                |        |
| 51 |                                                           |     |                                                                                                                                                                                                                                                                                                                                                                                |        |
| 52 |                                                           |     |                                                                                                                                                                                                                                                                                                                                                                                |        |
| 53 |                                                           |     |                                                                                                                                                                                                                                                                                                                                                                                |        |
| 54 |                                                           |     |                                                                                                                                                                                                                                                                                                                                                                                |        |
| 55 |                                                           |     |                                                                                                                                                                                                                                                                                                                                                                                |        |
| 56 |                                                           |     |                                                                                                                                                                                                                                                                                                                                                                                |        |
| 57 |                                                           |     |                                                                                                                                                                                                                                                                                                                                                                                |        |
| 58 |                                                           |     |                                                                                                                                                                                                                                                                                                                                                                                |        |
| 59 |                                                           |     |                                                                                                                                                                                                                                                                                                                                                                                |        |
| 60 |                                                           |     |                                                                                                                                                                                                                                                                                                                                                                                |        |
|    | Trial design                                              | 8   | Description of trial design including type of trial (eg, parallel group, crossover, factorial, single group), allocation ratio, and framework (eg, superiority, equivalence, noninferiority, exploratory)                                                                                                                                                                      | 3      |
|    | <b>Methods: Participants, interventions, and outcomes</b> |     |                                                                                                                                                                                                                                                                                                                                                                                |        |
|    |                                                           |     |                                                                                                                                                                                                                                                                                                                                                                                |        |
|    | Study setting                                             | 9   | Description of study settings (eg, community clinic, academic hospital) and list of countries where data will be collected. Reference to where list of study sites can be obtained                                                                                                                                                                                             | 3      |
|    | Eligibility criteria                                      | 10  | Inclusion and exclusion criteria for participants. If applicable, eligibility criteria for study centres and individuals who will perform the interventions (eg, surgeons, psychotherapists)                                                                                                                                                                                   | 3-4+13 |
|    | Interventions                                             | 11a | Interventions for each group with sufficient detail to allow replication, including how and when they will be administered                                                                                                                                                                                                                                                     | 4      |
|    |                                                           | 11b | Criteria for discontinuing or modifying allocated interventions for a given trial participant (eg, drug dose change in response to harms, participant request, or improving/worsening disease)                                                                                                                                                                                 | 4      |
|    |                                                           | 11c | Strategies to improve adherence to intervention protocols, and any procedures for monitoring adherence (eg, drug tablet return, laboratory tests)                                                                                                                                                                                                                              | 4      |
|    |                                                           | 11d | Relevant concomitant care and interventions that are permitted or prohibited during the trial                                                                                                                                                                                                                                                                                  | 4      |
|    | Outcomes                                                  | 12  | Primary, secondary, and other outcomes, including the specific measurement variable (eg, systolic blood pressure), analysis metric (eg, change from baseline, final value, time to event), method of aggregation (eg, median, proportion), and time point for each outcome. Explanation of the clinical relevance of chosen efficacy and harm outcomes is strongly recommended | 5-6    |
|    | Participant timeline                                      | 13  | Time schedule of enrolment, interventions (including any run-ins and washouts), assessments, and visits for participants. A schematic diagram is highly recommended (see Figure)                                                                                                                                                                                               | 12+14  |
|    | Sample size                                               | 14  | Estimated number of participants needed to achieve study objectives and how it was determined, including clinical and statistical assumptions supporting any sample size calculations                                                                                                                                                                                          | 6-7    |
|    | Recruitment                                               | 15  | Strategies for achieving adequate participant enrolment to reach target sample size                                                                                                                                                                                                                                                                                            | 4      |

|                                                                     |     |                                                                                                                                                                                                                                                                                                                                                                                                              |     |
|---------------------------------------------------------------------|-----|--------------------------------------------------------------------------------------------------------------------------------------------------------------------------------------------------------------------------------------------------------------------------------------------------------------------------------------------------------------------------------------------------------------|-----|
| <b>Methods: Assignment of interventions (for controlled trials)</b> |     |                                                                                                                                                                                                                                                                                                                                                                                                              |     |
| Allocation:                                                         |     |                                                                                                                                                                                                                                                                                                                                                                                                              | 4   |
| Sequence generation                                                 | 16a | Method of generating the allocation sequence (eg, computer-generated random numbers), and list of any factors for stratification. To reduce predictability of a random sequence, details of any planned restriction (eg, blocking) should be provided in a separate document that is unavailable to those who enrol participants or assign interventions                                                     |     |
| Allocation concealment mechanism                                    | 16b | Mechanism of implementing the allocation sequence (eg, central telephone; sequentially numbered, opaque, sealed envelopes), describing any steps to conceal the sequence until interventions are assigned                                                                                                                                                                                                    | 4   |
| Implementation                                                      | 16c | Who will generate the allocation sequence, who will enrol participants, and who will assign participants to interventions                                                                                                                                                                                                                                                                                    | 4   |
| Blinding (masking)                                                  | 17a | Who will be blinded after assignment to interventions (eg, trial participants, care providers, outcome assessors, data analysts), and how                                                                                                                                                                                                                                                                    | 4   |
|                                                                     | 17b | If blinded, circumstances under which unblinding is permissible, and procedure for revealing a participant's allocated intervention during the trial                                                                                                                                                                                                                                                         | NR  |
| <b>Methods: Data collection, management, and analysis</b>           |     |                                                                                                                                                                                                                                                                                                                                                                                                              |     |
| Data collection methods                                             | 18a | Plans for assessment and collection of outcome, baseline, and other trial data, including any related processes to promote data quality (eg, duplicate measurements, training of assessors) and a description of study instruments (eg, questionnaires, laboratory tests) along with their reliability and validity, if known. Reference to where data collection forms can be found, if not in the protocol | 5-6 |
|                                                                     | 18b | Plans to promote participant retention and complete follow-up, including list of any outcome data to be collected for participants who discontinue or deviate from intervention protocols                                                                                                                                                                                                                    | 4   |
| Data management                                                     | 19  | Plans for data entry, coding, security, and storage, including any related processes to promote data quality (eg, double data entry; range checks for data values). Reference to where details of data management procedures can be found, if not in the protocol                                                                                                                                            | 7   |
| Statistical methods                                                 | 20a | Statistical methods for analysing primary and secondary outcomes. Reference to where other details of the statistical analysis plan can be found, if not in the protocol                                                                                                                                                                                                                                     | 7   |
|                                                                     | 20b | Methods for any additional analyses (eg, subgroup and adjusted analyses)                                                                                                                                                                                                                                                                                                                                     | 7   |

|                                 |     |                                                                                                                                                                                                                                                                                                                                       |    |
|---------------------------------|-----|---------------------------------------------------------------------------------------------------------------------------------------------------------------------------------------------------------------------------------------------------------------------------------------------------------------------------------------|----|
|                                 |     |                                                                                                                                                                                                                                                                                                                                       |    |
|                                 |     |                                                                                                                                                                                                                                                                                                                                       | 7  |
|                                 | 20c | Definition of analysis population relating to protocol non-adherence (eg, as randomised analysis), and any statistical methods to handle missing data (eg, multiple imputation)                                                                                                                                                       |    |
| <b>Methods: Monitoring</b>      |     |                                                                                                                                                                                                                                                                                                                                       |    |
| Data monitoring                 | 21a | Composition of data monitoring committee (DMC); summary of its role and reporting structure; statement of whether it is independent from the sponsor and competing interests; and reference to where further details about its charter can be found, if not in the protocol. Alternatively, an explanation of why a DMC is not needed | 7  |
|                                 | 21b | Description of any interim analyses and stopping guidelines, including who will have access to these interim results and make the final decision to terminate the trial                                                                                                                                                               | NR |
| Harms                           | 22  | Plans for collecting, assessing, reporting, and managing solicited and spontaneously reported adverse events and other unintended effects of trial interventions or trial conduct                                                                                                                                                     | 6  |
| Auditing                        | 23  | Frequency and procedures for auditing trial conduct, if any, and whether the process will be independent from investigators and the sponsor                                                                                                                                                                                           | NR |
| <b>Ethics and dissemination</b> |     |                                                                                                                                                                                                                                                                                                                                       |    |
| Research ethics approval        | 24  | Plans for seeking research ethics committee/institutional review board (REC/IRB) approval                                                                                                                                                                                                                                             | 7  |
| Protocol amendments             | 25  | Plans for communicating important protocol modifications (eg, changes to eligibility criteria, outcomes, analyses) to relevant parties (eg, investigators, REC/IRBs, trial participants, trial registries, journals, regulators)                                                                                                      | 7  |
| Consent or assent               | 26a | Who will obtain informed consent or assent from potential trial participants or authorised surrogates, and how (see Item 32)                                                                                                                                                                                                          | 7  |
|                                 | 26b | Additional consent provisions for collection and use of participant data and biological specimens in ancillary studies, if applicable                                                                                                                                                                                                 | 7  |
| Confidentiality                 | 27  | How personal information about potential and enrolled participants will be collected, shared, and maintained in order to protect confidentiality before, during, and after the trial                                                                                                                                                  | 7  |
| Declaration of interests        | 28  | Financial and other competing interests for principal investigators for the overall trial and each study site                                                                                                                                                                                                                         | 11 |

|                                  |                               |     |                                                                                                                                                                                                                                                                                     |     |
|----------------------------------|-------------------------------|-----|-------------------------------------------------------------------------------------------------------------------------------------------------------------------------------------------------------------------------------------------------------------------------------------|-----|
| 1<br>2<br>3<br>4<br>5            | Access to data                | 29  | Statement of who will have access to the final trial dataset, and disclosure of contractual agreements that limit such access for investigators                                                                                                                                     | 4+8 |
| 6<br>7<br>8                      | Ancillary and post-trial care | 30  | Provisions, if any, for ancillary and post-trial care, and for compensation to those who suffer harm from trial participation                                                                                                                                                       | NR  |
| 9<br>10<br>11<br>12<br>13<br>14  | Dissemination policy          | 31a | Plans for investigators and sponsor to communicate trial results to participants, healthcare professionals, the public, and other relevant groups (eg, via publication, reporting in results databases, or other data sharing arrangements), including any publication restrictions | 7   |
| 15<br>16<br>17                   |                               | 31b | Authorship eligibility guidelines and any intended use of professional writers                                                                                                                                                                                                      | 10  |
| 18<br>19<br>20<br>21             |                               | 31c | Plans, if any, for granting public access to the full protocol, participant-level dataset, and statistical code                                                                                                                                                                     | NR  |
| 22<br>23                         | <b>Appendices</b>             |     |                                                                                                                                                                                                                                                                                     |     |
| 24<br>25<br>26                   | Informed consent materials    | 32  | Model consent form and other related documentation given to participants and authorised surrogates                                                                                                                                                                                  |     |
| 27<br>28<br>29<br>30<br>31<br>32 | Biological specimens          | 33  | Plans for collection, laboratory evaluation, and storage of biological specimens for genetic or molecular analysis in the current trial and for future use in ancillary studies, if applicable                                                                                      |     |

33 \*It is strongly recommended that this checklist be read in conjunction with the SPIRIT 2013  
 34 Explanation & Elaboration for important clarification on the items. Amendments to the  
 35 protocol should be tracked and dated. The SPIRIT checklist is copyrighted by the SPIRIT  
 36 Group under the Creative Commons "[Attribution-NonCommercial-NoDerivs 3.0 Unported](https://creativecommons.org/licenses/by-nc-nd/3.0/)"  
 37 license.  
 38  
 39  
 40  
 41  
 42  
 43  
 44  
 45  
 46  
 47  
 48  
 49  
 50  
 51  
 52  
 53  
 54  
 55  
 56  
 57  
 58  
 59  
 60
